## BRAIN STIMULATION DEPRESSION META-ANALYSIS

1 **Title:** Efficacy and acceptability of non-invasive brain stimulation for the treatment of adult  
2 unipolar and bipolar depression: A systematic review and meta-analysis of randomised sham-  
3 controlled trials

4

5 **Authors:** Julian Mutz<sup>1</sup> MSc, Daniel R. Edgcumbe<sup>2</sup> MSc, Andre R. Brunoni<sup>3,4</sup> MD PhD,  
6 Cynthia H.Y. Fu<sup>2,5</sup> MD PhD

7

### 8 **Affiliations:**

9 1. Department of Epidemiology and Biostatistics, School of Public Health, Faculty of  
10 Medicine, Imperial College London, United Kingdom

11 2. School of Psychology, College of Applied Health and Communities, University of East  
12 London, United Kingdom

13 3. Service of Interdisciplinary Neuromodulation, Laboratory of Neurosciences (LIM-27) and  
14 National Institute of Biomarkers in Psychiatry (INBioN), Department and Institute of  
15 Psychiatry, Hospital das Clínicas HCFMUSP, Faculdade de Medicina, Universidade de  
16 Sao Paulo, Sao Paulo, SP, Brazil.

17 4. Department of Psychiatry and Psychotherapy, Ludwig-Maximilians-University, Munich,  
18 Germany.

19 5. Centre for Affective Disorders, Department of Psychological Medicine, Institute of  
20 Psychiatry, Psychology and Neuroscience, King's College London, United Kingdom

21

### 22 **Author for Correspondence:**

23 Julian Mutz, Department of Epidemiology and Biostatistics, School of Public Health, Faculty  
24 of Medicine, Imperial College London, United Kingdom; Norfolk Place, London W2 1PG,  
25 United Kingdom. Email: [julian.mutz@gmail.com](mailto:julian.mutz@gmail.com); phone: +44(0)2075943686.

## BRAIN STIMULATION DEPRESSION META-ANALYSIS

### 26 **Abstract**

27 We examined the efficacy and acceptability of non-invasive brain stimulation in adult  
28 unipolar and bipolar depression. Randomised sham-controlled trials of transcranial direct  
29 current stimulation (tDCS), transcranial magnetic stimulation (TMS) and theta-burst  
30 stimulation (TBS), without co-initiation of another treatment, were included. We analysed  
31 response, remission and all-cause discontinuation rates, and depression severity scores. Fifty-  
32 four studies were included ( $N = 2,959$ , mean age = 44.94 years, 61.98% female). Response  
33 rates demonstrated efficacy of high-frequency rTMS over the left DLPFC (OR = 3.94, 95%  
34 CI [2.52; 6.15]), right-sided low-frequency rTMS (OR = 7.44, 95% CI [2.06; 26.83]) bilateral  
35 rTMS (OR = 3.68, 95% CI [1.66; 8.13]), deep TMS (OR = 1.69, 95% CI [1.003; 2.85]),  
36 intermittent TBS (OR = 4.70, 95% CI [1.14; 19.38]) and tDCS (OR = 4.32, 95% CI [2.02;  
37 9.29]); but not for continuous TBS, bilateral TBS or synchronised TMS. There were no  
38 differences in all-cause discontinuation rates. The strongest evidence was for high-frequency  
39 rTMS over the left DLPFC. Intermittent TBS provides an advance in terms of reduced  
40 treatment duration. tDCS is a potential treatment for non-resistant depression.

41

42 *Keywords:* transcranial magnetic stimulation, theta burst stimulation, transcranial direct  
43 current stimulation, major depression, meta-analysis

## BRAIN STIMULATION DEPRESSION META-ANALYSIS

### 44 **Introduction**

45 Major depression is prevalent<sup>1</sup> and associated with considerable disease burden<sup>2</sup>. Its course is  
46 often recurrent and may become chronic with relapse rates within one year of remission  
47 ranging from 35% to 80%<sup>3,4</sup>. The most common treatments are pharmacological and  
48 psychological therapies. Yet, even with a full course of treatment, at least one third of patients  
49 fail to achieve remission<sup>5</sup>. Non-invasive neurostimulation therapies, such as transcranial  
50 magnetic stimulation (TMS) and transcranial electrical stimulation (tES), offer a potential  
51 alternative or add-on treatment strategy.

52  
53 TMS was originally introduced as a tool for investigating and mapping cortical functions and  
54 connectivity<sup>6</sup>. TMS utilises intense, rapidly-changing electromagnetic fields, which are  
55 generated by a coil of wire near the scalp, and allows for a mostly undistorted induction of an  
56 electrical current to alter neural activity in relatively focal, superficial areas of the brain.  
57 Standard TMS typically involves single or paired pulses, and repetitive transcranial magnetic  
58 stimulation (rTMS) involves the delivery of repeated pulses which enable the prolonged  
59 modulation of neural activity. Depending on the stimulation frequency, rTMS can increase or  
60 decrease cortical excitability. The prevailing hypothesis is that high-frequency (usually 10 Hz  
61 or higher) stimulation is excitatory and causes neural depolarisation, whereas low-frequency  
62 ( $\leq 1$  Hz) stimulation inhibits neural firing Rosa and Lisanby<sup>7</sup>.

63  
64 The rationale for using rTMS to treat depressive illness comes from clinical symptomatology  
65 and neuroanatomy as well as neuroimaging studies indicating functional impairments in  
66 prefrontal cortical and limbic regions<sup>8</sup>. In 2008, the US Food and Drug Administration (FDA)  
67 approved the first rTMS device for the treatment major depressive disorder (MDD) in which  
68 there was poor response to at least one pharmacological agent in the current episode<sup>9</sup>, and its  
69 clinical utilisation has increased since<sup>10</sup>.

## BRAIN STIMULATION DEPRESSION META-ANALYSIS

70

71 As stimulation at high frequencies can be uncomfortable during the initial stimulation period,  
72 low-frequency rTMS may minimise the occurrence of undesired side effects, namely  
73 headaches and scalp discomfort, and may be associated with fewer adverse events, for  
74 instance by lowering the risk for seizures<sup>11</sup>.

75

76 Bilateral applications of rTMS have also been developed: simultaneous stimulation over the  
77 left and right DLPFC (rDLPFC) or stimulation over one side followed by stimulation of the  
78 other side. These applications were hypothesised to be potentially additive or synergistic to  
79 reinstate any imbalance in prefrontal neural activity<sup>12</sup>. Moreover, there may be a selective  
80 unilateral response and the likelihood for a clinical response may increase by providing both  
81 types of stimulation<sup>13</sup>.

82

83 Technical and methodological efforts to improve the antidepressant efficacy of TMS have led  
84 to several alternative treatment protocols. Deep TMS (dTMS) was FDA-approved in 2013,  
85 which is able to stimulate larger brain volumes and deeper structures<sup>14</sup> that could be more  
86 directly relevant in the pathophysiology of depression (e.g., reward-mediating pathways and  
87 areas connected to the subgenual cingulate cortex)<sup>8,15,16</sup>.

88

89 Another recent modification is theta burst stimulation (TBS)<sup>17</sup>, which is a patterned form of  
90 TMS pulse delivery that utilises high and low frequencies in the same stimulus train. TBS  
91 delivers bursts of three at a high frequency (50 Hz) with an inter-burst interval of 5Hz in the  
92 theta range at 5 Hz. Two different protocols are utilised: continuous theta burst stimulation  
93 (cTBS), which delivers 300 or 600 pulses without interruption, and intermittent theta burst  
94 stimulation (iTBS), which delivers 30 pulses every 10 seconds for a duration of 190 seconds,  
95 totalling 600 pulses Chung, et al. <sup>18</sup>. It is suggested that cTBS reduces cortical excitability

## BRAIN STIMULATION DEPRESSION META-ANALYSIS

96 while iTBS increases it, mimicking the processes of long-term potentiation and long-term  
97 depression, respectively<sup>17</sup>. Notably, there is some debate as to whether prolonged stimulation  
98 periods reverse the hypothesised effects of TBS Gamboa, et al.<sup>19</sup>, while there is also support  
99 for a dose-response relationship for iTBS<sup>20</sup>.

100

101 The main advantages of TBS are its reduced administration time, which is typically less than  
102 five minutes as opposed to 20–45 minutes for conventional rTMS, and the lower intensity  
103 needed to produce lasting neurophysiological effects, as TBS is typically administered at 80%  
104 of the resting motor threshold (rMT) and might be more comfortable than stimulation at  
105 higher intensities typically used with standard rTMS.

106

107 Synchronised TMS refers to magnetic low-field synchronised stimulation (sTMS), a new  
108 treatment paradigm that involves rotating spherical rare-earth (neodymium) magnets  
109 positioned sagittally along the midline of the scalp, which deliver stimulation synchronised to  
110 an individual's alpha frequency<sup>21</sup>. The magnets are positioned to provide a global magnetic  
111 field distributed broadly across the midline cortical surface (one magnet over the frontal polar  
112 region, one magnet over the top of the head, and one magnet over the parietal region). The  
113 rationale for sTMS synchronised to an individual's alpha frequency is the observation that  
114 one mechanism of action of rTMS is the entrainment of oscillatory activity to the  
115 programmed frequency of stimulation, thereby resetting thalamo-cortical oscillators and  
116 restoring normal endogenous oscillatory activity<sup>22</sup>. This modification of TMS may be  
117 associated with fewer treatment-emergent adverse and side effects because it does not cause  
118 neural depolarisation. It also uses less energy than conventional rTMS as it utilises sinusoidal  
119 instead of pulsed magnetic fields, which require less than 1% of the energy needed for  
120 conventional rTMS and may thus be less expensive.

121

## BRAIN STIMULATION DEPRESSION META-ANALYSIS

122 Access and costs are among the major impediments to a more widespread use of rTMS,  
123 although costs may be lower for TBS and sTMS. A less expensive technique is transcranial  
124 electrical stimulation (tES). Its most commonly used protocol, transcranial direct current  
125 stimulation (tDCS), was reappraised as a tool in research through the work of Priori, et al.<sup>23</sup>  
126 and Nitsche and Paulus<sup>24</sup>. tDCS involves the application of a low-amplitude electrical direct  
127 current through surface scalp electrodes to superficial areas of the brain. While it does not  
128 directly trigger action potentials, it modulates cortical excitability by shifting the neural  
129 membrane resting potential and these effects can outlast the electrical stimulation period<sup>25</sup>.  
130 The direction of such excitability changes may depend on the polarity of the stimulation:  
131 anodal stimulation is hypothesised to cause depolarisation and an increase in neural  
132 excitability, whereas cathodal stimulation causes hyperpolarisation and a decrease in cortical  
133 excitability<sup>26,27</sup>.

134

135 The advantages of tDCS compared to TMS include its ease of administration, being much less  
136 expensive, its more benign side effect profile, and its portability which could potentially be  
137 used in the home environment.

138

139 We sought to perform a systematic review and meta-analysis of the antidepressant efficacy  
140 and acceptability of non-invasive neuromodulation in treating a current depressive episode in  
141 unipolar and bipolar depression from randomised sham-controlled trials. The only study to  
142 date that evaluated the efficacy of a range of rTMS techniques is Brunoni, et al.<sup>28</sup> network  
143 meta-analysis<sup>28</sup>. However, the analysis had included trials that had co-initiated other  
144 treatments (e.g. sleep deprivation and TMS); trials which had not included a sham treatment;  
145 had not separated the TBS modifications; and had not included any age-related exclusion  
146 criteria. Also, tDCS trials were not included in that meta-analysis. We sought to address these  
147 limitations by including only trials with randomised allocation to active or sham treatments,

## BRAIN STIMULATION DEPRESSION META-ANALYSIS

- 148 excluding studies which had co-initiated another treatment, and limiting our sample to the
- 149 adult age range as geriatric depression may impact on efficacy.

## BRAIN STIMULATION DEPRESSION META-ANALYSIS

### 150 **Materials and Methods**

#### 151 **Search strategy and selection criteria**

152 We followed the Preferred Reporting Items for Systematic Reviews and Meta-Analyses  
153 (PRISMA) guidelines<sup>29</sup>. A systematic search of the Embase, Medline, and PsychINFO  
154 databases was performed from the first date available to 1<sup>st</sup> November 2017 (Figure 1,  
155 Supplementary Materials).

156

157 Inclusion criteria were: 1) adults aged 18 – 70 years; 2) DSM or ICD diagnosis of MDD or  
158 bipolar disorder currently in a major depressive episode; 3) randomised sham-controlled  
159 trials, which utilised a parallel-group or cross-over design; 4) clinician-administered  
160 depression rating scale, Hamilton Depression Rating Scale (HDRS; Hamilton <sup>30</sup>) or  
161 Montgomery-Åsberg Depression Rating Scale (MADRS; Montgomery and Åsberg <sup>31</sup>).

162

163 Exclusion criteria were: 1) primary diagnoses other than MDD or bipolar depression; 2)  
164 studies limited to a specific subtype of depression (e.g., postpartum depression or vascular  
165 depression) or in which a major depressive episode was a secondary diagnosis (e.g.,  
166 fibromyalgia and major depression); 3) co-initiation of any other form of treatment, such as  
167 pharmacotherapy or cognitive control training.

168

#### 169 **Data analysis**

170 The following sample characteristics were extracted: sex, age, hospitalisation status, whether  
171 patients with psychotic symptoms were excluded from the study, diagnosis, treatment  
172 strategy, and treatment resistance.

173



## BRAIN STIMULATION DEPRESSION META-ANALYSIS

174 The following treatment-related parameters were extracted. For TMS: type of coil and sham  
175 procedure, magnet location, stimulation frequency (Hz) for each site, stimulation intensity  
176 (percentage of the rMT), total number of pulses delivered, and number of treatment sessions.  
177 For TBS: data on the treatment protocol (iTBS, cTBS or bilateral TBS) were also recorded.  
178 For tDCS: location of the anode and cathode, electrode size (cm<sup>2</sup>), current intensity (mA) and  
179 density (mA/cm<sup>2</sup>), session duration, number of sessions, and duration of active stimulation in  
180 the sham condition.

181

182 The primary outcome measure was clinical response, defined as a  $\geq 50\%$  reduction in  
183 symptom scores at the primary study endpoint. Remission rates were the secondary outcome  
184 measure based on the definition provided by each study. If response or remission rates were  
185 reported for both HDRS and MADRS, data for the HDRS was selected to facilitate  
186 comparability between trials. If data for multiple versions of the HDRS were reported, the  
187 original 17-item version was selected. We extracted baseline and post-treatment depression  
188 scores. If available, the intention-to-treat (ITT) or modified intention-to-treat (mITT) data  
189 were preferred over data based only on completers. For cross-over trials, only data from the  
190 initial randomisation were used to avoid carry-over effects. Data presented in figures were  
191 extracted with WebPlotDigitizer (<http://arohatgi.info/WebPlotDigitizer/app/>). All-cause  
192 discontinuation rates were recorded separately for active and sham groups.

193

194 Data that could not be directly retrieved from the original publications were requested from  
195 the authors or searched for in previous systematic reviews and meta-analyses. For trials with  
196 more than two groups that could not be included as separate treatment comparisons, we  
197 combined groups to create single pair-wise comparisons.

198

199 Analyses were conducted using the ‘meta’ package<sup>32</sup> for RStudio (Version 0.98.932) and

## BRAIN STIMULATION DEPRESSION META-ANALYSIS

200 STATA (Version 13.1; StataCorp, 2013) was used for data processing.

201

202 Contour-enhanced funnel plots<sup>33</sup> were visually inspected to assess whether potential funnel  
203 asymmetry is likely to be due to statistical significance-based publication bias.

204

205 A random-effects model was chosen as it was assumed that the underlying true effect size  
206 would vary between studies. A random-effects model provides wider confidence intervals  
207 than a fixed-effects model if there is significant heterogeneity among studies and thus tends to  
208 be more conservative in estimating summary effect sizes.

209

210 For dichotomous outcome data, odds ratios (Mantel-Haenszel method) were used as an index  
211 of effect size. We also computed Hedge's *g* to estimate the effect sizes for continuous post-  
212 treatment depression scores.

213

214 Heterogeneity between studies was assessed with the  $Q_T$  statistic, which estimates whether the  
215 variance of effect sizes is greater than what would be expected due to sampling error. A *p*  
216 value smaller than .01 provides an indication for significant heterogeneity<sup>34</sup>. The  $I^2$  statistic  
217 was computed for each analysis to provide a descriptive measure of inconsistency across the  
218 results of individual trials included in our analyses. It provides an indication of what  
219 percentage of the observed variance in effect sizes reflects real differences in effect sizes as  
220 opposed to sampling error. Higgins, et al.<sup>35</sup> suggested that 25%, 50%, and 75% represent  
221 little, moderate, and high heterogeneity, respectively.

222

223 The Cochrane tool for assessing risk of bias in randomised trials<sup>36</sup> was used to evaluate  
224 included studies. Each trial received a score of low, high, or unclear risk of bias for each of

## BRAIN STIMULATION DEPRESSION META-ANALYSIS

225 the potential sources of bias. Two raters independently conducted the assessment of risk of  
226 bias.

## BRAIN STIMULATION DEPRESSION META-ANALYSIS

### 227 **Results**

228 Fifty-four RCTs, consisting of 127 treatment arms, met our inclusion criteria (Figure 1,  
229 Supplementary Materials). Overall, 64 treatment comparisons were included, total  $N = 2,959$   
230 patients (mean age = 44.94 years, 61.98% female) of whom  $n = 1,548$  were randomised to  
231 active and  $n = 1,411$  to sham treatments (Tables 1-4).

232

233 Visual inspection of the contour-enhanced funnel plots did not suggest small study effects  
234 (Figure 2; Supplementary Figure 1-2). However, due to the small number of studies, we only  
235 computed funnel plots for all neurostimulation techniques combined, which might mask small  
236 study effects pertaining to a specific treatment modality.

237

238 Sixty comparisons of experimental and sham treatment arms met the inclusion criteria for the  
239 meta-analysis of response rates (Table 5; Figure 3), and 46 treatment comparisons for the  
240 meta-analysis of remission rates (Table 6; Figure 4).

241

242 High-frequency rTMS over the left DLPFC (IDLDFC) was associated with improved rates of  
243 response as well as remission in comparison with sham treatment. The odds ratio of response  
244 was  $OR = 3.94$  compared to sham ( $k = 31$ , 95% CI [2.52; 6.15]). There was little evidence  
245 that the heterogeneity between trials exceeded that expected by chance ( $I^2 = 27.1\%$ ;  $Q_{30} =$   
246  $41.15$ ,  $p = .08$ ). Sensitivity analyses suggested similar effect sizes in trials that had recruited  
247 patients with unipolar depression only and those that had recruited both patients with unipolar  
248 and bipolar depression (Supplementary Figure 3a). Only one pilot study<sup>37</sup> had recruited  
249 patients with bipolar depression only, but provided no support for antidepressant efficacy ( $OR$   
250  $= 1.14$ , 95% CI [0.21; 6.37]). Response rates were greater in trials that (i) excluded patients  
251 with psychotic features, (ii) recruited outpatients only, and (iii) recruited either treatment

## BRAIN STIMULATION DEPRESSION META-ANALYSIS

252 resistant patients only or both treatment resistant patients and those that were not treatment  
253 resistant (Supplementary Figure 3b,c,d).

254

255 The odds of achieving remission were over twice that of sham ( $k = 25$ , OR = 2.74, 95% CI  
256 [1.75; 4.28]). There was no evidence for significant heterogeneity ( $I^2 = 0.0\%$ ;  $Q_{24} = 22.67$ ,  $p =$   
257 .54). Sensitivity analyses for remission rates were in line with those for response rates,  
258 although we did not find left-sided high-frequency rTMS to be effective in samples that had  
259 recruited both treatment resistant and non-treatment resistant patients (Supplementary Figure  
260 6a,b,c,d).

261

262 Low-frequency rTMS over the rDLPFC was also associated with significantly greater  
263 response and remission rates than sham stimulation. There was a sevenfold improvement in  
264 response rates compared to sham ( $k = 3$ , OR = 7.44 (95% CI [2.06; 26.83]), with no indication  
265 for significant heterogeneity between trials ( $I^2 = 0.0\%$ ;  $Q_2 = 1.59$ ,  $p = .45$ ). No sensitivity  
266 analyses were conducted due to the small number of treatment comparisons.

267

268 The odds of remission were greater than those of sham ( $k = 2$ , OR = 14.10 (95% CI [2.79;  
269 71.42]). Heterogeneity between trials was not greater than expected due to sampling error ( $I^2$   
270 = 0.0%;  $Q_1 = 0.50$ ,  $p = .48$ ). No sensitivity analyses were conducted due to the small number  
271 of treatment comparisons.

272

273 Low-frequency rTMS over the IDLPFC was not associated with any significant  
274 improvements in rates of response or remission. There were no significant differences in  
275 response rates compared to sham ( $k = 3$ , OR = 1.41, 95% CI [0.15; 12.88]). The heterogeneity  
276 between trials did not exceed that expected by chance ( $I^2 = 0.0\%$ ;  $Q_2 = 0.14$ ,  $p = .93$ ), and no  
277 sensitivity analyses were conducted due to the small number of treatment comparisons. There

## BRAIN STIMULATION DEPRESSION META-ANALYSIS

278 were no significant differences in remission rates compared to sham ( $k = 3$ , OR = 0.86, 95%  
279 CI [0.08; 9.11]). The variance in effect sizes between trials was no greater than expected due  
280 to sampling error ( $I^2 = 0.0\%$ ;  $Q_2 = 0.03$ ,  $p = .98$ ). No sensitivity analyses were conducted due  
281 to the small number of treatment comparisons.

282

283 Bilateral rTMS was associated with significant improvement in response but not remission  
284 rates compared to sham. There was a significant improvement in response rates compared to  
285 sham ( $k = 6$ , OR = 3.68 (95% CI [1.66; 8.13]), and the variance in effect sizes between trials  
286 did not exceed that expected due to sampling error ( $I^2 = 0.0\%$ ;  $Q_5 = 3.45$ ,  $p = .63$ ). Sensitivity  
287 analyses suggested subgroup differences according to whether trials had excluded psychotic  
288 patients or had recruited patients with diagnosis of MDD only, bipolar depression only, or  
289 both MDD and bipolar depression (Supplementary Figure 4a,b). We found no evidence for a  
290 significant improvement in rates of remission associated with bilateral TMS compared to  
291 sham ( $k = 5$ , OR = 3.05, 95% CI [0.87; 10.67]). There was no evidence for significant  
292 heterogeneity between trials ( $I^2 = 10.7\%$ ;  $Q_4 = 4.48$ ,  $p = .34$ ), and sensitivity analyses  
293 suggested no differences according to any patient characteristics tested (Supplementary  
294 Figure 7a,7b).

295

296 There were significant improvements in both response and remission rates for dTMS  
297 compared to sham. The response rates were marginally higher while statistically significant  
298 for dTMS relative to sham ( $k = 2$ , OR = 1.69, 95% CI [1.003; 2.85]). The variance in effect  
299 sizes between trials did not exceed that expected due to sampling error ( $I^2 = 0.0\%$ ;  $Q_1 = 0.97$ ,  
300  $p = .33$ ). No sensitivity analyses were conducted due to the small number of treatment  
301 comparisons. The remission rates were greater for dTMS compared to sham ( $k = 2$ , OR =  
302 2.24, 95% CI [1.24; 4.06]). There was no evidence for significant heterogeneity between trials

## BRAIN STIMULATION DEPRESSION META-ANALYSIS

303 ( $I^2 = 0.0\%$ ;  $Q_1 = 0.02$ ,  $p = 0.88$ ), and no sensitivity analyses were conducted due to the small  
304 number of treatment comparisons.

305

306 Neither response nor remission rates for sTMS were significantly higher than for sham. There  
307 was no evidence for increased response rates compared to sham ( $k = 2$ , OR = 2.71, 95% CI  
308 [0.44; 16.86]). There was significant heterogeneity between these two studies ( $I^2 = 75.9\%$ ;  
309  $Q_1 = 4.15$ ,  $p = .04$ ). No sensitivity analyses were conducted due to the small number of  
310 treatment comparisons. There were also no significant improvements in remission rates for  
311 sTMS compared to sham ( $k = 2$ , OR = 2.51 (95% CI [0.23; 26.76])). There was evidence for  
312 significant heterogeneity between the two studies though ( $I^2 = 75.7\%$ ;  $Q_1 = 4.12$ ,  $p = .04$ ). No  
313 sensitivity analyses were conducted due to the small number of treatment comparisons.

314

315 iTBS over the IDLPFC was associated with a fivefold improvement in response rates  
316 compared to sham ( $k = 2$ , OR = 4.70 (95% CI [1.14; 19.38])). The heterogeneity between trials  
317 did not exceed that expected by chance ( $I^2 = 0.0\%$ ;  $Q_1 = 0.02$ ,  $p = .89$ ). No sensitivity  
318 analyses were conducted due to the small number of treatment comparisons. For only one  
319 trial<sup>38</sup> was data on remission rates for iTBS available, with no evidence for antidepressant  
320 efficacy compared to sham.

321

322 Neither cTBS over the rDLPFC nor bilateral TBS were statistically different from sham in  
323 terms of response rates ( $k = 1$ , OR = 1.63, 95% CI [0.23; 11.46] and  $k = 2$ , OR = 4.28, 95% CI  
324 [0.54; 34.27])). For bilateral TBS there was evidence that the variance in effect sizes between  
325 studies was greater than what would be expected due to sampling error ( $I^2 = 65.7\%$ ;  $Q_1 =$   
326  $2.91$ ,  $p = .09$ ). No sensitivity analyses were conducted due to the small number of treatment  
327 comparisons. The only trial of bilateral TBS for which remission rates were available<sup>39</sup> found

## BRAIN STIMULATION DEPRESSION META-ANALYSIS

328 no evidence for its antidepressant efficacy compared to sham. No remission rates were  
329 available for cTBS.

330

331 tDCS was associated with significant improvement in both response and remission rates in  
332 comparison to sham stimulation. There was a significant improvement in response rates  
333 relative to sham ( $k = 8$ , OR = 4.32, 95% CI [2.02; 9.29]). There was little evidence for  
334 significant heterogeneity between studies ( $I^2 = 34.2\%$ ;  $Q_7 = 10.64$ ,  $p = .16$ ) and sensitivity  
335 analyses suggested tDCS to be effective only in patients with non-treatment resistant  
336 depression and in trials that had recruited patients with both treatment resistant and non-  
337 treatment resistant depression (Supplementary Figure 5).

338

339 The analysis of remission rates showed a statistically significant advantage of tDCS compared  
340 to sham ( $k = 7$ , OR = 3.07, 95% CI [1.58; 5.99]). There was no indication for significant  
341 heterogeneity between trials ( $I^2 = 4.4\%$ ;  $Q_6 = 6.27$ ,  $p = .39$ ), and sensitivity analyses found  
342 that only trials that had recruited patients with both treatment resistant and non-treatment  
343 resistant depression provided evidence for antidepressant efficacy.

344

345 Forty-six treatment comparisons reported post-intervention continuous depression scores.  
346 There was evidence for the antidepressant efficacy of high-frequency rTMS over the IDLPFC  
347 compared to sham ( $k = 28$ , Hedge's  $g = -0.75$ , 95% CI [-1.02; -0.47]), dTMS compared to  
348 sham ( $k = 2$ , Hedge's  $g = -0.29$ , 95% CI [-0.55; -0.03]), and tDCS compared to sham ( $k = 6$ ,  
349 Hedge's  $g = -0.76$ , 95% CI [-1.42; -0.10]). There was evidence for significant heterogeneity  
350 between trials for several treatment modalities (Table 7; Figure 5).

351



## BRAIN STIMULATION DEPRESSION META-ANALYSIS

352 Sixty-four treatment comparisons were available for all-cause discontinuation rates. There  
353 were no significant differences in drop-out rates for any treatment modalities (Table 8; Figure  
354 6).

## BRAIN STIMULATION DEPRESSION META-ANALYSIS

### 355 **Discussion**

356 The present systematic review and meta-analysis examined the efficacy and acceptability of  
357 non-invasive brain stimulation techniques for a current depressive episode in unipolar and  
358 bipolar depression. We sought to investigate the efficacy of the brain stimulation techniques  
359 without the potential confound of co-initiation of another treatment and in trials which had  
360 included randomised allocation to a sham stimulation treatment arm in order to account for  
361 potential placebo effects.

362

363 The largest evidence base to date is for high-frequency rTMS over the IDLPFC which is  
364 associated with 3.94 times greater odds of response than sham stimulation as well as odds of  
365 remission that are 2.74 times greater than sham. These findings are consistent with previous  
366 systematic reviews and meta-analyses Berlim, et al.<sup>40</sup> and have led to the consensus review  
367 and treatment guideline by the *Clinical TMS Society* for daily high-frequency rTMS over the  
368 IDLPFC for the treatment of medication-resistant or medication-intolerant depressive  
369 episodes<sup>41</sup>.

370

371 Additional support for treatment efficacy was revealed for low-frequency rTMS over the  
372 rDLPFC, which was associated with improved rates of response as well as remission.  
373 Bilateral rTMS was associated with higher rates of response but not remission. It is unclear  
374 whether any advantages of bilateral rTMS compared to left-sided high-frequency or right-  
375 sided low-frequency rTMS would be due to the treatment protocol. As bilateral stimulation  
376 delivers a greater number of pulses than unilateral stimulation, unless the number of treatment  
377 sessions or the treatment duration are adjusted for accordingly, it is difficult to reliably assess  
378 whether the difference in stimulation protocol (bilateral vs. unilateral stimulation) or the  
379 difference in the number of stimuli delivered leads to differences in clinical effects<sup>42</sup>.

380

## BRAIN STIMULATION DEPRESSION META-ANALYSIS

381 To date, no studies have directly compared dTMS and standard rTMS protocols. In an  
382 exploratory meta-analysis of nine open-label trials, including a total of 150 patients, Kedzior,  
383 et al.<sup>43</sup> provided evidence for the antidepressant efficacy of dTMS. The present meta-analysis  
384 found that dTMS was associated with 1.69 times greater odds of response and 2.24 greater  
385 odds of remission than sham which were statistically significant. While the open-label trials  
386 included in Kedzior, et al.<sup>43</sup> may have overestimated the true efficacy of dTMS, we provide  
387 initial support for the clinical efficacy of dTMS that was greater than for sham treatment but  
388 less than for high-frequency rTMS over the IDLPFC, low-frequency rTMS over the rDLPFC  
389 or bilateral rTMS.

390

391 The meta-analytic estimates did not indicate significant treatment effects associated with low-  
392 frequency rTMS over the IDLPFC or with sTMS. However, these have been trialled in only  
393 three<sup>44-46</sup> and two studies<sup>21,47</sup>, respectively. Specific treatment effects of TMS that depend on  
394 side and frequency of stimulation have been proposed but it may be possible that low-  
395 frequency rTMS over the IDLPFC has a marginal effect in at least a small number of  
396 patients<sup>46</sup>. Leuchter, et al.<sup>47</sup> found sTMS to only be effective when administered at the  
397 individual's alpha frequency and with a minimum of 80% treatment adherence, suggesting a  
398 dose-response relationship.

399

400 With theta burst stimulation, the duration of each treatment session is reduced to a few  
401 minutes. Our meta-analysis did demonstrate almost five times greater odds of response  
402 compared to sham for iTBS over the IDLPFC. However, this estimate is based on two trials  
403 only. One trial had examined remission rates as well<sup>38</sup>, reporting remission rates of 0% for  
404 sham and 9.1% for active stimulation. The meta-analytic estimates for cTBS and the bilateral  
405 modification of TBS did not show any advantage over sham in terms of response rates. The  
406 only trial that reported remission rates for bilateral TBS did not provide evidence for its

## BRAIN STIMULATION DEPRESSION META-ANALYSIS

407 antidepressant efficacy either and no data were available to evaluate remission rates following  
408 cTBS.

409

410 Transcranial direct current stimulation is a form of neurostimulation that offers greater  
411 portability and lower costs relative to TMS. The meta-analysis revealed significant  
412 improvements in response and remission rates following tDCS treatment in comparison to  
413 sham, which was 4.32 times greater for response rates and 3.07 times greater for remission  
414 rates. We have been able to identify the effects of tDCS without potential confounds of co-  
415 initiation of another treatment, revealing significantly greater odds of response as well as  
416 remission<sup>48</sup>. The clinical efficacy of tDCS is evident also in the non-treatment resistant form  
417 of depression, in contrast to most rTMS trials, suggesting that tDCS is a potential initial  
418 therapeutic option for depression.

419

420 The finding that there were no differences in terms of drop-out rates at study end between the  
421 active treatment and sham conditions for any treatment modality suggests that non-invasive  
422 brain stimulation is generally well tolerated by patients. We chose all-cause discontinuation  
423 rates based on the intention-to-treat sample, representing the most conservative estimate of  
424 treatment acceptability.

425

426 We chose response and remission rates as our main outcome measures, which arguably  
427 constitute clinically-useful estimates of the antidepressant efficacy of non-invasive brain  
428 stimulation techniques. However, response and remission rates were not reported for each  
429 trial, and some missing data could not be obtained. Studies have also suggested that the  
430 antidepressant efficacy of active stimulation may separate from sham only after multiple  
431 weeks of treatment, for both rTMS<sup>9</sup> Reardon, et al. <sup>9</sup>Chistyakov, et al. <sup>49</sup> and cTBS<sup>49</sup>. We  
432 only looked at the acute antidepressant effects at primary study endpoint, and we cannot

## BRAIN STIMULATION DEPRESSION META-ANALYSIS

433 estimate the long-term effects.

434

435 A significant number of TMS studies used active magnetic stimulation with the coil being  
436 angulated at 45 or 90 degrees to the scalp surface as sham condition. Because differences in  
437 coil orientation may produce considerably different sensations on the scalp and coil  
438 angulation might still produce a limited degree of intracortical activity<sup>50</sup>, ensuring a valid  
439 control condition constitutes a methodological challenge. One study placed an inactive coil on  
440 the patient's head while discharging an active coil at least one meter away in order to mimic  
441 the auditory effects of rTMS<sup>51</sup>.

442

443 A more recent approach is to use a specifically designed sham coil that does not generate a  
444 magnetic field but is visually and auditorily indistinguishable from an active coil. A meta-  
445 analysis by Berlim, et al.<sup>52</sup> found no significant differences between the number of patients  
446 who correctly guessed their treatment allocation when comparing active high-frequency left-  
447 sided or bilateral rTMS and sham. There were also no significant differences between studies  
448 that utilised angulated coils and sham coils. Blinding integrity is less of a methodological  
449 hurdle for sTMS trials because neither active stimulation nor sham procedure produce any  
450 physical sensation, they look identical, and are comparable in terms of acoustic artefacts.  
451 Only few of the more recent modifications of TMS reported on the adequacy of their blinding  
452 procedure. Given that cross-over designs are particularly prone to unblinding after cross-over,  
453 we included only data corresponding to the initial randomisation in our analyses.

454

455 For tDCS, the sham condition typically involves delivering active stimulation for up to 30  
456 seconds, which mimics the initial somatic sensations without inducing a therapeutic effect.  
457 However, the adequacy of blinding of tDCS sham has also been called into question<sup>53</sup>.

458

## BRAIN STIMULATION DEPRESSION META-ANALYSIS

459 The clinical trials had enrolled patients based on a diagnostic assessment of clinical symptoms  
460 rather than underlying brain pathology. The potential for biological heterogeneity might mask  
461 the clinical efficacy of non-invasive brain stimulation in some trials but could not be assessed  
462 in the present analysis. We implemented reasonably strict inclusion criteria to limit the  
463 influence of a range of potential confounders, for example we excluded RCTs that co-initiated  
464 treatment with medication. However, potential effects of specific medications on the clinical  
465 efficacy of brain stimulation could not be adequately controlled for as patients often had a  
466 large number of heterogeneous treatments prior to enrolling, which might have distorted the  
467 clinical effects of brain stimulation.

468

469 Finally, compared to the network meta-analysis on TMS<sup>28</sup>, we were not able to compare the  
470 active treatments. In the NMA priming rTMS seemed most effective. However, the two RCTs  
471 that used this treatment modality compared it with another active stimulation and could not be  
472 included in the present meta-analysis.

473

### 474 **Conclusion**

475 The present systematic review and meta-analysis supports the efficacy and acceptability of  
476 non-invasive brain stimulation techniques in adult unipolar and bipolar depression. The  
477 strongest evidence was for high-frequency rTMS over the IDLPFC, followed by low-  
478 frequency rTMS over the rDLPFC and bilateral rTMS. Intermittent TBS provides a potential  
479 advance in terms of reduced treatment duration and the meta-analysis did find support for  
480 improved rates of response. tDCS is a potential treatment for non-resistant depression which  
481 has demonstrated efficacy in terms of response as well as remission. All the trials included in  
482 the present meta-analysis had included randomised allocation to a sham treatment arm and we  
483 had excluded trials in which there was co-initiation of another treatment. Some of the more

## BRAIN STIMULATION DEPRESSION META-ANALYSIS

484 recent treatment modalities though require additional trials and more direct comparisons  
485 between different treatment modalities are warranted.

486

### 487 **Authorship contributions**

488 J.M. and C.H.Y.F. conceived the project; J.M. performed the systematic literature search with  
489 supervision by C.H.Y.F; J.M. extracted and analysed the data; D.R.E. confirmed the quality  
490 of the extracted data; J.M. wrote the initial draft of the paper; C.H.Y.F. and A.R.B. critically  
491 revised the paper, including interpretation of the data. All authors read and approved the final  
492 version of this paper.

493

### 494 **Funding and disclosure**

495 The authors declare no conflict of interest.

496

### 497 **Acknowledgments**

498 We thank Dr Angelo Alonzo & Professor Colleen Loo, Professor Ian Anderson, Dr Lysianne  
499 Beynel, Dr Noomane Bouaziz & Dr Dominique Januel, Dr Poul E Buchholtz, Dr Romain  
500 Duprat & Professor Chris Baeken, Professor Mark S George, Professor Ehud Klein, Professor  
501 Berthold Langguth & Dr Martin Schecklmann, Dr Giuseppe Lanza, Professor Andy Leuchter,  
502 Dr Alessandra Minelli, Professor William M McDonald, Professor Declan McLoughlin, Dr  
503 Marie-Laure Paillère Martinot, Dr Bill Phillips, Professor Rober M Post, Dr Mohammad Ali  
504 Salehinejad, Dr Christos Theleritis, and Professor Abraham Zangen for providing additional  
505 data. We are also grateful to those authors who could not provide additional data but  
506 responded to our inquiry. The views expressed in this article represent those of the authors  
507 and not necessarily those of the individuals who have provided additional data for the  
508 analyses.

509

## BRAIN STIMULATION DEPRESSION META-ANALYSIS

510 **Supplementary material**

511 Supplementary information is available online.



## BRAIN STIMULATION DEPRESSION META-ANALYSIS

### 512 **References**

- 513 1 Kessler, R. C. *et al.* The epidemiology of major depressive disorder: results from the  
514 National Comorbidity Survey Replication (NCS-R). *Jama* **289**, 3095-3105 (2003).
- 515 2 Murray, C. J. *et al.* Global, regional, and national disability-adjusted life years  
516 (DALYs) for 306 diseases and injuries and healthy life expectancy (HALE) for 188  
517 countries, 1990–2013: quantifying the epidemiological transition. *The Lancet* **386**,  
518 2145-2191 (2015).
- 519 3 Fekadu, A. *et al.* What happens to patients with treatment-resistant depression? A  
520 systematic review of medium to long term outcome studies. *Journal of affective*  
521 *disorders* **116**, 4-11 (2009).
- 522 4 Eaton, W. W. *et al.* Population-based study of first onset and chronicity in major  
523 depressive disorder. *Archives of General Psychiatry* **65**, 513-520 (2008).
- 524 5 Rush, A. J. *et al.* Acute and longer-term outcomes in depressed outpatients requiring  
525 one or several treatment steps: a STAR\* D report. *American Journal of Psychiatry*  
526 **163**, 1905-1917 (2006).
- 527 6 Barker, A. T., Jalinous, R. & Freeston, I. L. Non-invasive magnetic stimulation of  
528 human motor cortex. *The Lancet* **325**, 1106-1107 (1985).
- 529 7 Rosa, M. A. & Lisanby, S. H. Somatic treatments for mood disorders.  
530 *Neuropsychopharmacology* **37**, 102-116 (2012).
- 531 8 Atkinson, L., Sankar, A., Adams, T. M. & Fu, C. H. Recent advances in neuroimaging  
532 of mood disorders: structural and functional neural correlates of depression, changes  
533 with therapy, and potential for clinical biomarkers. *Current Treatment Options in*  
534 *Psychiatry* **1**, 278-293 (2014).
- 535 9 O'Reardon, J. P. *et al.* Efficacy and safety of transcranial magnetic stimulation in the  
536 acute treatment of major depression: a multisite randomized controlled trial.  
537 *Biological psychiatry* **62**, 1208-1216 (2007).
- 538 10 Janicak, P. G., Sackett, V., Kudrna, K. & Cutler, B. Advances in transcranial magnetic  
539 stimulation for managing major depressive disorders: The utility of TMS for treating  
540 depression continues to widen, as the technology is refined. *Current Psychiatry* **15**,  
541 49-56 (2016).
- 542 11 Rossi, S., Hallett, M., Rossini, P. M., Pascual-Leone, A. & Group, S. o. T. C. Safety,  
543 ethical considerations, and application guidelines for the use of transcranial magnetic  
544 stimulation in clinical practice and research. *Clinical neurophysiology* **120**, 2008-2039  
545 (2009).

## BRAIN STIMULATION DEPRESSION META-ANALYSIS

- 546 12 Conca, A. *et al.* Combining high and low frequencies in rTMS antidepressive  
547 treatment: preliminary results. *Human Psychopharmacology: Clinical and*  
548 *Experimental* **17**, 353-356 (2002).
- 549 13 Fitzgerald, P. B. *et al.* A randomized, controlled trial of sequential bilateral repetitive  
550 transcranial magnetic stimulation for treatment-resistant depression. *American Journal*  
551 *of Psychiatry* **163**, 88-94 (2006).
- 552 14 Roth, Y., Amir, A., Levkovitz, Y. & Zangen, A. Three-dimensional distribution of the  
553 electric field induced in the brain by transcranial magnetic stimulation using figure-8  
554 and deep H-coils. *Journal of Clinical Neurophysiology* **24**, 31-38 (2007).
- 555 15 Greicius, M. D. *et al.* Resting-state functional connectivity in major depression:  
556 abnormally increased contributions from subgenual cingulate cortex and thalamus.  
557 *Biological psychiatry* **62**, 429-437 (2007).
- 558 16 Costafreda, S. G. *et al.* Modulation of amygdala response and connectivity in  
559 depression by serotonin transporter polymorphism and diagnosis. *Journal of affective*  
560 *disorders* **150**, 96-103 (2013).
- 561 17 Huang, Y.-Z., Edwards, M. J., Rounis, E., Bhatia, K. P. & Rothwell, J. C. Theta burst  
562 stimulation of the human motor cortex. *Neuron* **45**, 201-206 (2005).
- 563 18 Chung, S., Hoy, K. & Fitzgerald, P. Theta-burst stimulation: a new form of TMS  
564 treatment for depression? *Depression and anxiety* **32**, 182-192 (2015).
- 565 19 Gamboa, O. L., Antal, A., Moliadze, V. & Paulus, W. Simply longer is not better:  
566 reversal of theta burst after-effect with prolonged stimulation. *Experimental brain*  
567 *research* **204**, 181-187 (2010).
- 568 20 Nettekoven, C. *et al.* Dose-dependent effects of theta burst rTMS on cortical  
569 excitability and resting-state connectivity of the human motor system. *The Journal of*  
570 *Neuroscience* **34**, 6849-6859 (2014).
- 571 21 Jin, Y. & Phillips, B. A pilot study of the use of EEG-based synchronized Transcranial  
572 Magnetic Stimulation (sTMS) for treatment of Major Depression. *BMC psychiatry* **14**,  
573 1 (2014).
- 574 22 Leuchter, A. F., Cook, I. A., Jin, Y. & Phillips, B. The relationship between brain  
575 oscillatory activity and therapeutic effectiveness of transcranial magnetic stimulation  
576 in the treatment of major depressive disorder. *Frontiers in Human Neuroscience* **7**  
577 (2013).
- 578 23 Priori, A., Berardelli, A., Rona, S., Accornero, N. & Manfredi, M. Polarization of the  
579 human motor cortex through the scalp. *Neuroreport* **9**, 2257-2260 (1998).

## BRAIN STIMULATION DEPRESSION META-ANALYSIS

- 580 24 Nitsche, M. A. & Paulus, W. Excitability changes induced in the human motor cortex  
581 by weak transcranial direct current stimulation. *The Journal of physiology* **527**, 633-  
582 639 (2000).
- 583 25 Nitsche, M. A. *et al.* Transcranial direct current stimulation: state of the art 2008.  
584 *Brain stimulation* **1**, 206-223 (2008).
- 585 26 Nitsche, M. A. & Paulus, W. Sustained excitability elevations induced by transcranial  
586 DC motor cortex stimulation in humans. *Neurology* **57**, 1899-1901 (2001).
- 587 27 Merzagora, A. C. *et al.* Prefrontal hemodynamic changes produced by anodal direct  
588 current stimulation. *Neuroimage* **49**, 2304-2310 (2010).
- 589 28 Brunoni, A. R. *et al.* Repetitive transcranial magnetic stimulation for the acute  
590 treatment of major depressive episodes: A systematic review with network meta-  
591 analysis. *JAMA psychiatry* **74**, 143-152 (2017).
- 592 29 Moher, D., Liberati, A., Tetzlaff, J. & Altman, D. G. Preferred reporting items for  
593 systematic reviews and meta-analyses: the PRISMA statement. *Annals of internal*  
594 *medicine* **151**, 264-269 (2009).
- 595 30 Hamilton, M. A rating scale for depression. *Journal of Neurology, Neurosurgery &*  
596 *Psychiatry* **23**, 56-62 (1960).
- 597 31 Montgomery, S. A. & Åsberg, M. A new depression scale designed to be sensitive to  
598 change. *The British journal of Psychiatry* **134**, 382-389 (1979).
- 599 32 Schwarzer, G. Meta: An R package for meta-analysis. *R news* **7**, 40-45 (2007).
- 600 33 Peters, J. L., Sutton, A. J., Jones, D. R., Abrams, K. R. & Rushton, L. Contour-  
601 enhanced meta-analysis funnel plots help distinguish publication bias from other  
602 causes of asymmetry. *Journal of clinical epidemiology* **61**, 991-996 (2008).
- 603 34 Cochran, W. G. The combination of estimates from different experiments. *Biometrics*  
604 **10**, 101-129 (1954).
- 605 35 Higgins, J. P., Thompson, S. G., Deeks, J. J. & Altman, D. G. Measuring  
606 inconsistency in meta-analyses. *British Medical Journal* **327**, 557-560 (2003).
- 607 36 Higgins, J. P. *et al.* The Cochrane Collaboration's tool for assessing risk of bias in  
608 randomised trials. *BMJ* **343**, 889-893 (2011).
- 609 37 Nahas, Z., Kozel, F. A., Li, X., Anderson, B. & George, M. S. Left prefrontal  
610 transcranial magnetic stimulation (TMS) treatment of depression in bipolar affective  
611 disorder: a pilot study of acute safety and efficacy. *Bipolar disorders* **5**, 40-47 (2003).

## BRAIN STIMULATION DEPRESSION META-ANALYSIS

- 612 38 Duprat, R. *et al.* Accelerated intermittent theta burst stimulation treatment in  
613 medication-resistant major depression: A fast road to remission? *Journal of affective*  
614 *disorders* **200**, 6-14 (2016).
- 615 39 Prasser, J. *et al.* Bilateral prefrontal rTMS and theta burst TMS as an add-on treatment  
616 for depression: a randomized placebo controlled trial. *The World Journal of Biological*  
617 *Psychiatry* **16**, 57-65 (2015).
- 618 40 Berlim, M. T., Van den Eynde, F., Tovar-Perdomo, S. & Daskalakis, Z. Response,  
619 remission and drop-out rates following high-frequency repetitive transcranial magnetic  
620 stimulation (rTMS) for treating major depression: a systematic review and meta-  
621 analysis of randomized, double-blind and sham-controlled trials. *Psychological*  
622 *medicine* **44**, 225-239 (2014).
- 623 41 Perera, T. *et al.* The Clinical TMS Society Consensus Review and Treatment  
624 Recommendations for TMS Therapy for Major Depressive Disorder. *Brain*  
625 *stimulation* **9**, 336-346 (2016).
- 626 42 Chen, J.-j. *et al.* Bilateral vs. unilateral repetitive transcranial magnetic stimulation in  
627 treating major depression: a meta-analysis of randomized controlled trials. *Psychiatry*  
628 *Research* **219**, 51-57 (2014).
- 629 43 Kedzior, K. K., Gellersen, H. M., Brachetti, A. K. & Berlim, M. T. Deep transcranial  
630 magnetic stimulation (DTMS) in the treatment of major depression: an exploratory  
631 systematic review and meta-analysis. *Journal of Affective Disorders* **187**, 73-83  
632 (2015).
- 633 44 Padberg, F. *et al.* Repetitive transcranial magnetic stimulation (rTMS) in  
634 pharmacotherapy-refractory major depression: comparative study of fast, slow and  
635 sham rTMS. *Psychiatry research* **88**, 163-171 (1999).
- 636 45 Kimbrell, T. A. *et al.* Frequency dependence of antidepressant response to left  
637 prefrontal repetitive transcranial magnetic stimulation (rTMS) as a function of  
638 baseline cerebral glucose metabolism. *Biological psychiatry* **46**, 1603-1613 (1999).
- 639 46 Speer, A. M., Wassermann, E. M., Benson, B. E., Herscovitch, P. & Post, R. M.  
640 Antidepressant efficacy of high and low frequency rTMS at 110% of motor threshold  
641 versus sham stimulation over left prefrontal cortex. *Brain stimulation* **7**, 36-41 (2014).
- 642 47 Leuchter, A. F. *et al.* Efficacy and safety of low-field synchronized transcranial  
643 magnetic stimulation (sTMS) for treatment of major depression. *Brain stimulation* **8**,  
644 787-794 (2015).

## BRAIN STIMULATION DEPRESSION META-ANALYSIS

- 645 48 Meron, D., Hedger, N., Garner, M. & Baldwin, D. S. Transcranial direct current  
646 stimulation (tDCS) in the treatment of depression: systematic review and meta-  
647 analysis of efficacy and tolerability. *Neuroscience & Biobehavioral Reviews* **57**, 46-62  
648 (2015).
- 649 49 Chistyakov, A. V. *et al.* Preliminary assessment of the therapeutic efficacy of  
650 continuous theta-burst magnetic stimulation (cTBS) in major depression: a double-  
651 blind sham-controlled study. *Journal of affective disorders* **170**, 225-229 (2015).
- 652 50 Lisanby, S. H., Gutman, D., Luber, B., Schroeder, C. & Sackeim, H. A. Sham TMS:  
653 intracerebral measurement of the induced electrical field and the induction of motor-  
654 evoked potentials. *Biological psychiatry* **49**, 460-463 (2001).
- 655 51 Loo, C. K., Mitchell, P. B., McFarquhar, T. F., Malhi, G. S. & Sachdev, P. S. A sham-  
656 controlled trial of the efficacy and safety of twice-daily rTMS in major depression.  
657 *Psychological medicine* **37**, 341-349 (2007).
- 658 52 Berlin, M. T., Broadbent, H. J. & Van den Eynde, F. Blinding integrity in randomized  
659 sham-controlled trials of repetitive transcranial magnetic stimulation for major  
660 depression: a systematic review and meta-analysis. *International Journal of*  
661 *Neuropsychopharmacology* **16**, 1173-1181 (2013).
- 662 53 Blumberger, D. M., Tran, L. C., Fitzgerald, P. B., Hoy, K. E. & Daskalakis, Z. J. A  
663 randomized double-blind sham-controlled study of transcranial direct current  
664 stimulation for treatment-resistant major depression. *Frontiers in Psychiatry* **3**, 119-  
665 126 (2012).

## BRAIN STIMULATION DEPRESSION META-ANALYSIS

### 666 **Figure captions**

667 Figure 1. Preferred Reporting Items for Systematic Reviews and Meta-Analyses (PRISMA)

668 flow diagram of literature search.

669 Figure 2. Contour-enhanced funnel plot of all RCTs included in the meta-analysis of response  
670 rates.

671 Figure 3. Forest plot of response rates.

672 Figure 4. Forest plot of remission rates.

673 Figure 5. Forest plot of post-treatment continuous depression scores.

674 Figure 6. Forest plot of all-cause discontinuation rates.

675

# BRAIN STIMULATION DEPRESSION META-ANALYSIS

Table 1

*Treatment characteristics: TMS studies*

| Authors                         | Location | Frequency (Hz) |       | % rMT            | Total pulses | Sessions | Treatment strategy | Active group    | Sham group |
|---------------------------------|----------|----------------|-------|------------------|--------------|----------|--------------------|-----------------|------------|
|                                 |          | Left           | Right |                  |              |          |                    |                 |            |
| Anderson et al., 2007           | LDLPFC   | 10             | -     | 110 <sup>a</sup> | 12,000       | 12       | Mixed              | Figure-of-eight | Sham-coil  |
| Avery et al., 2006              | LDLPFC   | 10             | -     | 110 <sup>b</sup> | 24,000       | 15       | Mixed              | Figure-of-eight | 90°        |
| Avery et al., 1999              | LDLPFC   | 10             | -     | 80               | NR           | 10       | Mixed              | NR              | 45°        |
| Baeken et al., 2013*            | LDLPFC   | 20             | -     | 110              | 31,200       | 20       | Monotherapy        | Figure-of-eight | 90°        |
| Bakim et al., 2012 <sup>1</sup> | LDLPFC   | 20             | -     | 80; 100          | 24,000       | 30       | Augmentation       | Figure-of-eight | 45°        |
| Berman et al., 2000             | LDLPFC   | 20             | -     | 80               | NR           | 10       | Monotherapy        | Figure-of-eight | 30-45°     |
| Bortolomasi et al., 2007        | LDLPFC   | 20             | -     | 90               | 4,000        | 5        | Mixed              | Circular        | 90°        |
| Boutros et al., 2002            | LDLPFC   | 20             | -     | 80               | 8,000        | 10       | Mixed              | Figure-of-eight | 90°        |
| Chen et al., 2013               | LDLPFC   | 20             | -     | 90               | NR           | 10       | Augmentation       | Figure-of-eight | 90°        |
| Concerto et al., 2015           | LDLPFC   | 10             | -     | 120              | 60,000       | 20       | Augmentation       | Figure-of-eight | 45°        |
| Eschweiler et al., 2000*        | LDLPFC   | 10             | -     | 90               | NR           | 5        | Augmentation       | Figure-of-eight | 90°        |

## BRAIN STIMULATION DEPRESSION META-ANALYSIS

|                                  |        |                    |   |                  |        |    |              |                 |                  |
|----------------------------------|--------|--------------------|---|------------------|--------|----|--------------|-----------------|------------------|
| Fitzgerald et al., 2012 (1)      | LDLPFC | 10                 | - | 120              | NR     | 15 | Mixed        | Figure-of-eight | 45°              |
| Fitzgerald et al., 2003 (1)      | LDLPFC | 10                 | - | 100              | 10,000 | 10 | Augmentation | Figure-of-eight | 45°              |
| Garcia-Toro et al., 2001         | LDLPFC | 20                 | - | 90               | NR     | 10 | Augmentation | Figure-of-eight | 90°              |
| George et al., 2010              | LDLPFC | 10                 | - | 120              | 45,000 | 15 | Monotherapy  | Figure-of-eight | Sham-coil        |
| George et al., 2000 <sup>2</sup> | LDLPFC | 5; 20 <sup>c</sup> | - | 100 <sup>d</sup> | 16,000 | 10 | Monotherapy  | Figure-of-eight | 45°              |
| George et al., 1997*             | LDLPFC | 20                 | - | 80               | 8000   | 10 | Mixed        | Figure-of-eight | 45°              |
| Hansen et al., 2004              | LDLPFC | 10                 | - | 90               | 30,000 | 15 | Augmentation | Figure-of-eight | 90°              |
| Hernández-Ribas et al., 2013     | LDLPFC | 15                 | - | 100              | 22,500 | 15 | Augmentation | Figure-of-eight | 90°              |
| Holtzheimer et al., 2004         | LDLPFC | 10                 | - | 110              | 16,000 | 10 | Monotherapy  | Figure-of-eight | 45 <sup>oe</sup> |
| Jakob et al., 2008 (1)           | LDLPFC | 20                 | - | 100              | 20,000 | 10 | Mixed        | Figure-of-eight | Sham-coil        |
| Jakob et al., 2008 (2)           | LDLPFC | 50                 | - | 100              | 20,000 | 10 | Mixed        | Figure-of-eight | Sham-coil        |
| Kimbrell et al., 1999*           | LDLPFC | 20                 | - | 80               | 8,000  | 10 | Monotherapy  | Figure-of-eight | 45°              |
| Kreuzer et al., 2015             | LDLPFC | 10                 | - | 110              | 30,000 | 15 | Augmentation | Figure-of-eight | Sham-coil        |
| Lingeswaran et al., 2011         | LDLPFC | 10                 | - | 100              | NR     | 12 | NR           | Figure-of-eight | 90°              |
| Loo et al., 1999*                | LDLPFC | 10                 | - | 110              | NR     | 10 | Mixed        | Figure-of-eight | 90°              |



## BRAIN STIMULATION DEPRESSION META-ANALYSIS

|                                |        |       |   |                  |        |                 |              |                 |           |
|--------------------------------|--------|-------|---|------------------|--------|-----------------|--------------|-----------------|-----------|
| Nahas et al., 2003             | LDLPFC | 5     | - | 110              | 16,000 | 10              | Monotherapy  | Figure-of-eight | 45°       |
| O'Reardon et al., 2007         | LDLPFC | 10    | - | 120 <sup>g</sup> | 60,000 | 20              | Monotherapy  | Figure-of-eight | Sham-coil |
| Paillère-Martinot et al., 2010 | LDLPFC | 10    | - | 90               | 16,000 | 10              | Augmentation | Figure-of-eight | Sham-coil |
| Speer et al., 2014             | LDLPFC | 20    | - | 110              | 24,000 | 15              | Monotherapy  | Figure-of-eight | 45°       |
| Su et al., 2005 <sup>3</sup>   | LDLPFC | 5; 20 | - | 100              | 16,000 | 10              | Augmentation | Figure-of-eight | 90°       |
| Theleritis et al., 2017 (1)    | LDLPFC | 20    | - | 100              | 24,000 | 15              | Mixed        | Figure-of-eight | 90°       |
| Theleritis et al., 2017 (2)    | LDLPFC | 20    | - | 100              | 48,000 | 30 <sup>f</sup> | Mixed        | Figure-of-eight | 90°       |
| Zheng et al., 2010             | LDLPFC | 15    | - | 110 <sup>g</sup> | 60,000 | 20              | Augmentation | Figure-of-eight | 90°       |
| LF-R                           |        |       |   |                  |        |                 |              |                 |           |
| Fitzgerald et al., 2003 (2)    | RDLPFC | -     | 1 | 100              | 3,000  | 10              | Augmentation | Figure-of-eight | 45°       |
| Januel et al., 2006            | RDLPFC | -     | 1 | 90               | 1,920  | 16              | Monotherapy  | Figure-of-eight | Sham-coil |
| Pallanti et al., 2010 (1)      | RDLPFC | -     | 1 | 110              | 6,300  | 15              | Augmentation | Figure-of-eight | Sham-coil |
| LF-L                           |        |       |   |                  |        |                 |              |                 |           |
| Kimbrell et al., 1999*         | LDLPFC | 1     | - | 80               | 8,000  | 10              | Monotherapy  | Figure-of-eight | 45°       |
| Padberg et al., 1999           | LDLPFC | 0.3   | - | 90               | 1,250  | 5               | Mixed        | Figure-of-eight | 90°       |

## BRAIN STIMULATION DEPRESSION META-ANALYSIS

|                                    |        |    |    |                 |        |                 |              |                 |           |
|------------------------------------|--------|----|----|-----------------|--------|-----------------|--------------|-----------------|-----------|
| Speer et al., 2014                 | LDLPFC | 1  | -  | 110             | 24,000 | 15              | Monotherapy  | Figure-of-eight | 45°       |
| BL                                 |        |    |    |                 |        |                 |              |                 |           |
| Fitzgerald et al., 2006            | DLPFC  | 10 | 1  | 110(R); 100(L)  | 7,200  | 10              | Mixed        | Figure-of-eight | 45°       |
| Fitzgerald et al., 2016            | DLPFC  | 10 | 1  | 110             | 40,000 | 20              | Mixed        | Figure-of-eight | 45°       |
| Fitzgerald et al., 2012 (2)        | DLPFC  | 10 | 1  | 120             | NR     | 15              | Mixed        | Figure-of-eight | 45°       |
| McDonald et al., 2006 <sup>4</sup> | DLPFC  | 10 | 1  | 110             | 16,000 | 10              | Monotherapy  | Figure-of-eight | 90°       |
| Pallanti et al., 2010 (2)          | DLPFC  | 10 | 1  | 110(R); 100(L)  | 21,300 | 15              | Augmentation | Figure-of-eight | Sham-coil |
| Prasser et al., 2015 (1)           | DLPFC  | 10 | 1  | 110             | 30,000 | 15              | Augmentation | Figure-of-eight | Sham-coil |
| iTBS                               |        |    |    |                 |        |                 |              |                 |           |
| Duprat et al., 2016*               | LDLPFC | 50 | -  | 110             | 32,400 | 20 <sup>i</sup> | Monotherapy  | Figure-of-eight | Sham-coil |
| Li et al., 2014 (1)                | LDLPFC | 50 | -  | 80 <sup>j</sup> | 18,000 | 10              | Mixed        | Figure-of-eight | 90°       |
| cTBS                               |        |    |    |                 |        |                 |              |                 |           |
| Li et al., 2014 (2)                | RDLPFC | 50 | -  | 80 <sup>j</sup> | 18,000 | 10              | Mixed        | Figure-of-eight | 90°       |
| BLTBS                              |        |    |    |                 |        |                 |              |                 |           |
| Li et al., 2014 (3)                | DLPFC  | 50 | 50 | 80 <sup>j</sup> | 36,000 | 10              | Mixed        | Figure-of-eight | 90°       |

## BRAIN STIMULATION DEPRESSION META-ANALYSIS

|                               |         |           |    |                  |        |    |              |                 |           |
|-------------------------------|---------|-----------|----|------------------|--------|----|--------------|-----------------|-----------|
| Prasser et al., 2015 (2)      | DLPFC   | 50        | 50 | 80               | 36,000 | 15 | Augmentation | Figure-of-eight | Sham-coil |
| dTMS                          |         |           |    |                  |        |    |              |                 |           |
| Levkovitz et al., 2015        | LDLPFC  | 18        | -  | 120 <sup>h</sup> | 39,600 | 20 | Monotherapy  | H1              | Sham-coil |
| Tavares et al., 2017          | LDLPFC  | 18        | -  | 120              | 39,600 | 20 | Augmentation | H1              | Sham-coil |
| sTMS                          |         |           |    |                  |        |    |              |                 |           |
| Jin et al., 2014 <sup>5</sup> | Midline | IAF; 8-13 |    | -                | -      | 20 | Augmentation | sTMS            | NMRS      |
| Leuchter et al., 2015         | Midline | IAF       |    | -                | -      | 30 | Monotherapy  | sTMS            | NMRS      |

*Note.* Numbers in parentheses behind authors indicate that multiple active treatment arms of the same study are reported. Hz = hertz; rMT = resting motor threshold; LDLPFC = left dorsolateral prefrontal cortex; RDLPFC = right dorsolateral prefrontal cortex; TMS = transcranial magnetic stimulation; HF-L = high-frequency, left-sided repetitive transcranial magnetic stimulation; LF-R = low-frequency, right-sided repetitive transcranial magnetic stimulation; BL = bilateral repetitive transcranial magnetic stimulation; iTBS = intermittent theta burst stimulation; cTBS = continuous theta burst stimulation; BLTBS = bilateral theta burst stimulation; dTMS = deep transcranial magnetic stimulation; sTMS = synchronised transcranial magnetic stimulation; IAF = individual alpha frequency; NMRS = non-magnetic rotating shaft; NR = not reported. \*Cross-over design. <sup>1-5</sup>Two active treatment groups were combined. <sup>a</sup>Two patients received active stimulation at 100% rMT. <sup>b</sup>Stimulation delivered at estimated prefrontal threshold. <sup>c</sup>During the 5th session, stimulation was delivered for 2min at 10Hz. <sup>d</sup>During the 5th session, stimulation was delivered for 2min at 60% rMT. <sup>e</sup>Two patients received sham treatment with the coil angulated at 90°. <sup>f</sup>Received treatment twice daily. <sup>g</sup>During the first week, 110% rMT could be used for tolerability. <sup>h</sup>During the first three treatment session, rMT could be titrated from 100% to 120%. <sup>i</sup>Received treatment five times daily. <sup>j</sup>Stimulation delivered at active motor threshold.

## BRAIN STIMULATION DEPRESSION META-ANALYSIS

Table 2

*Sample characteristics: TMS studies*

| Authors                            | Number of participants (female) |         | Age         |             | Diagnosis | HDRS / MADRS              |                           | Excluded psychosis | Status     | Treatment resistance |
|------------------------------------|---------------------------------|---------|-------------|-------------|-----------|---------------------------|---------------------------|--------------------|------------|----------------------|
|                                    | Active                          | Sham    | Active      | Sham        |           | Active                    | Sham                      |                    |            |                      |
| HF-L                               |                                 |         |             |             |           |                           |                           |                    |            |                      |
| Anderson et al., 2007 <sup>1</sup> | 13 (7)                          | 16 (9)  | 48.0 (8.0)  | 46.0 (12.0) | MDD       | 26.7 (3.6) <sup>M</sup>   | 27.7 (7.1) <sup>M</sup>   | No                 | Outpatient | Mixed                |
| Avery et al., 2006 <sup>2</sup>    | 35 (21)                         | 33 (16) | 44.3 (10.3) | 44.2 (9.7)  | MDD       | 23.5 (3.9) <sup>a</sup>   | 23.5 (2.9) <sup>a</sup>   | Yes                | NR         | TRD                  |
| Avery et al., 1999                 | 4 (4)                           | 2 (1)   | 44.3 (10.1) | 45.0 (7.1)  | Mixed     | 21.3 (6.7) <sup>b</sup>   | 19.5 (8.1) <sup>b</sup>   | Yes                | Outpatient | TRD                  |
| Baeken et al., 2013                | 9 (7)                           | 11 (5)  | 51.8 (12.1) | 47.3 (13.7) | MDD       | 24.8 (7.1) <sup>a</sup>   | 26.5 (8.7) <sup>a</sup>   | Yes                | Mixed      | TRD                  |
| Bakim et al., 2012 <sup>3</sup>    | 23 (20)                         | 12 (11) | 40.8 (10.0) | 44.4 (10.2) | MDD       | 23.6 (3.6) <sup>a</sup>   | 25.6 (3.8) <sup>a</sup>   | Yes                | Outpatient | TRD                  |
| Berman et al., 2000 <sup>2</sup>   | 10 (2)                          | 10 (4)  | 45.2 (9.5)  | 39.4 (10.8) | Mixed     | 37.1 (9.7) <sup>c</sup>   | 37.3 (8.5) <sup>c</sup>   | No                 | Mixed      | TRD                  |
| Bortolomasi et al., 2007           | 12 (7)                          | 7 (4)   | NR          | NR          | Mixed     | 25.17 (7.84) <sup>d</sup> | 21.57 (2.15) <sup>d</sup> | No                 | Inpatient  | TRD                  |
| Boutros et al., 2002 <sup>6</sup>  | 12 (4)                          | 9 (1)   | 49.5 (8.0)  | 52.0 (7.0)  | MDD       | 34.4 (10.1) <sup>c</sup>  | 31.7 (4.9) <sup>c</sup>   | No                 | Outpatient | TRD                  |

## BRAIN STIMULATION DEPRESSION META-ANALYSIS

|                                          |         |         |                             |                           |       |                                |                                |     |            |         |
|------------------------------------------|---------|---------|-----------------------------|---------------------------|-------|--------------------------------|--------------------------------|-----|------------|---------|
| Chen et al., 2013                        | 10 (7)  | 10 (4)  | 44.1 (4.4)                  | 47.3 (3.5)                | MDD   | 23.5 (1.9) <sup>a</sup>        | 24.9 (1.9) <sup>a</sup>        | No  | Inpatient  | TRD     |
| Concerto et al., 2015                    | 15 (6)  | 15 (7)  | 51.0 (6.5)                  | 53.0 (6.7)                | MDD   | 22.0 (21.0; 24.0) <sup>b</sup> | 21.0 (20.0; 22.0) <sup>b</sup> | Yes | Outpatient | TRD     |
| Eschweiler et al., 2000                  | 5 (NR)  | 5 (NR)  | NR                          | NR                        | MDD   | 27.4 (4.6) <sup>b</sup>        | 20.2 (3.8) <sup>b</sup>        | No  | NR         | non-TRD |
| Fitzgerald et al., 2012 (1) <sup>2</sup> | 24 (15) | 20 (8)  | 43.4 (12.7)                 | 44.9 (15.7)               | MDD   | 23.7 (3.8) <sup>a</sup>        | 22.8 (2.1) <sup>a</sup>        | No  | NR         | TRD     |
| Fitzgerald et al., 2003 (1)              | 20 (8)  | 20 (11) | 42.2 (9.8)                  | 49.2 (14.2)               | Mixed | 36.1 (7.5) <sup>M</sup>        | 35.7 (8.1) <sup>M</sup>        | No  | Outpatient | TRD     |
| Garcia-Toro et al., 2001                 | 17 (7)  | 18 (8)  | 51.5 (15.9)                 | 50.0 (11.0)               | MDD   | 27.1 (6.7) <sup>b</sup>        | 25.6 (4.9) <sup>b</sup>        | No  | NR         | TRD     |
| George et al., 2010 <sup>2</sup>         | 92 (58) | 98 (50) | 47.7 (10.6)                 | 46.5 (12.3)               | MDD   | 26.3 (5.0) <sup>d</sup>        | 26.5 (4.8) <sup>d</sup>        | Yes | Outpatient | TRD     |
| George et al., 2000 <sup>4</sup>         | 20 (13) | 10 (6)  | 42.4 (10.5)                 | 48.5 (8.0)                | Mixed | 28.2 (5.9) <sup>b</sup>        | 23.8 (4.1) <sup>b</sup>        | Yes | Outpatient | Mixed   |
| George et al., 1997                      | 7 (6)   | 5 (5)   | 42.4 (15.5)                 | 41.0 (8.3)                | Mixed | 30.0 (4.0) <sup>b</sup>        | 26.0 (3.0) <sup>b</sup>        | Yes | Outpatient | non-TRD |
| Hansen et al., 2004 <sup>6</sup>         | 6 (2)   | 7 (2)   | 42.5 (38; 58) <sup>13</sup> | 46 (44; 62) <sup>15</sup> | Mixed | 26.5 (21.5; 27.6) <sup>a</sup> | 23.8 (19.4; 28.0) <sup>a</sup> | No  | Inpatient  | NR      |
| Hernández-Ribas et al., 2013             | 10 (8)  | 11 (8)  | 42.6 (5.6)                  | 50.1 (8.1)                | Mixed | 19.7 (3.8) <sup>b</sup>        | 16.6 (2.4) <sup>b</sup>        | Yes | Outpatient | TRD     |
| Holtzheimer et al., 2004                 | 7 (4)   | 8 (3)   | 40.4 (8.5)                  | 45.4 (4.9)                | MDD   | 22.7 (5.3) <sup>a</sup>        | 20.8 (6.3) <sup>a</sup>        | Yes | Outpatient | TRD     |
| Jakob 2008 (1)                           | 12 (6)  | 12 (5)  | NR                          | NR                        | MDD   | 27.2 (NR) <sup>a</sup>         | 23.9 (NR) <sup>a</sup>         | NR  | NR         | NR      |

## BRAIN STIMULATION DEPRESSION META-ANALYSIS

|                                         |          |          |             |                          |                  |                          |                         |     |            |     |
|-----------------------------------------|----------|----------|-------------|--------------------------|------------------|--------------------------|-------------------------|-----|------------|-----|
| Jakob 2008 (2)                          | 12 (7)   | 12 (5)   | NR          | NR                       | MDD              | 24.1 (NR) <sup>a</sup>   | 23.9 (NR) <sup>a</sup>  | NR  | NR         | NR  |
| Kimbrell et al., 1999                   | 5 (2)    | 3 (1)    | 40.2 (15.1) | 43.7 (19.1)              | Mixed            | 25.0 (6.6) <sup>b</sup>  | 24.3 (6.8) <sup>b</sup> | No  | Mixed      | TRD |
| Kreuzer et al., 2015                    | 15 (8)   | 12 (8)   | 46.1 (9.5)  | 43.8 (10.5)              | Mixed            | 22.3 (4.7) <sup>b</sup>  | 22.3 (4.7) <sup>b</sup> | No  | Inpatient  | NR  |
| Lingeswaran et al., 2011                | 9 (6)    | 14 (8)   | 34 (10.5)   | 37.2 (11.8)              | MDD              | 22.8 (3.7) <sup>a</sup>  | 22.0 (3.1) <sup>a</sup> | Yes | Mixed      | NR  |
| Loo et al., 1999                        | 9 (NR)   | 9 (NR)   | 45.7 (14.7) | 50.9 (14.7)              | Mixed            | 21.5 (NR) <sup>a</sup>   | 25.1 (NR) <sup>a</sup>  | No  | Mixed      | TRD |
| Nahas et al., 2003                      | 11 (7)   | 12 (7)   | 42.4 (7.3)  | 43.4 (9.3) <sup>11</sup> | BD <sup>12</sup> | 32.5 (4.3) <sup>e</sup>  | 32.8 (7.6) <sup>e</sup> | NA  | Outpatient | NR  |
| O'Reardon et al., 2007 <sup>6</sup>     | 155 (86) | 146 (74) | 47.9 (11.0) | 48.7 (10.6)              | MDD              | 22.6 (3.3) <sup>a</sup>  | 22.9 (3.5) <sup>a</sup> | Yes | Outpatient | TRD |
| Paillère-Martinot et al., 2010          | 18 (11)  | 14 (10)  | 48.2 (7.8)  | 46.6 (10.3)              | Mixed            | 26.0 (6.4) <sup>b</sup>  | 25.9 (6.7) <sup>b</sup> | Yes | Inpatient  | TRD |
| Speer et al., 2014 <sup>2</sup>         | 8 (5)    | 8 (11)   | 41.3 (14.5) | 44.9 (9.1)               | Mixed            | 35.8 (10.6) <sup>e</sup> | 24.0 (4.6) <sup>e</sup> | No  | Mixed      | TRD |
| Su et al., 2005 <sup>5</sup>            | 20 (15)  | 10 (17)  | 43.4 (11.3) | 42.6 (11.0)              | Mixed            | 24.9 (6.4) <sup>b</sup>  | 22.7 (4.7) <sup>b</sup> | Yes | NR         | TRD |
| Theleiter et al., 2017 (1) <sup>6</sup> | 26 (15)  | 20 (10)  | 39.1 (10.1) | 38.0 (9.9)               | MDD              | 30.6 (3.2) <sup>a</sup>  | 29.4 (3.2) <sup>a</sup> | Yes | Outpatient | TRD |
| Theleiter et al., 2017 (2) <sup>6</sup> | 26 (11)  | 24 (10)  | 38.9 (13.9) | 39.4 (8.9)               | MDD              | 29.7 (4.6) <sup>a</sup>  | 30.3 (3.6) <sup>a</sup> | Yes | Outpatient | TRD |
| Zheng et al., 2010                      | 19 (7)   | 15 (5)   | 26.9 (6.2)  | 26.7 (4.3)               | MDD              | 24.6 (3.0) <sup>a</sup>  | 24.6 (2.8) <sup>a</sup> | Yes | NR         | TRD |

BRAIN STIMULATION DEPRESSION META-ANALYSIS

| LF-R                                     |         |         |             |               |       |                          |                           |     |            |         |
|------------------------------------------|---------|---------|-------------|---------------|-------|--------------------------|---------------------------|-----|------------|---------|
| Fitzgerald et al., 2003 (2)              | 20 (7)  | 20 (11) | 45.6 (11.5) | 49.2 (14.2)   | Mixed | 37.7 (8.4) <sup>M</sup>  | 35.7 (8.1) <sup>M</sup>   | No  | Outpatient | TRD     |
| Januel et al., 2006 <sup>2</sup>         | 11 (9)  | 16 (12) | 38.6 (11.2) | 37.2 (11.7)   | MDD   | 21.7 (3.5) <sup>a</sup>  | 22.5 (2.7) <sup>a</sup>   | Yes | Inpatient  | non-TRD |
| Pallanti et al., 2010 (1)                | 20 (12) | 20 (12) | 51.2 (12.5) | 47.9 (9.1)    | MDD   | 28.0 (5.9) <sup>a</sup>  | 29.1 (3.5) <sup>a</sup>   | Yes | Outpatient | TRD     |
| LF-L                                     |         |         |             |               |       |                          |                           |     |            |         |
| Kimbrell et al., 1999 (2) <sup>2</sup>   | 5 (4)   | 3 (1)   | 44 (15.92)  | 43.67 (19.14) | Mixed | 34.4 (7.99) <sup>b</sup> | 24.33 (6.81) <sup>b</sup> | No  | Mixed      | TRD     |
| Padberg et al., 1999                     | 6 (5)   | 6 (4)   | 46.7 (14.7) | 43.3 (11.6)   | MDD   | 26.7 (9.4) <sup>b</sup>  | 22.2 (8.8) <sup>b</sup>   | NR  | NR         | TRD     |
| Speer et al., 2014                       | 8 (5)   | 8 (3)   | 39.6 (9)    | 44.9 (9.1)    | Mixed | 28.6 (7.6) <sup>e</sup>  | 24 (4.6) <sup>e</sup>     | No  | Mixed      | TRD     |
| BL                                       |         |         |             |               |       |                          |                           |     |            |         |
| Fitzgerald et al., 2006 <sup>2</sup>     | 25 (15) | 25 (16) | 46.8 (10.7) | 43.7 (10.2)   | Mixed | 22.5 (7.4) <sup>a</sup>  | 19.8 (4.4) <sup>a</sup>   | No  | Outpatient | TRD     |
| Fitzgerald et al., 2016 <sup>7</sup>     | 23 (13) | 23 (13) | 46.3 (12.6) | 49.7 (11.0)   | BD    | 23.2 (4.0) <sup>a</sup>  | 23.0 (5.1) <sup>a</sup>   | NA  | Outpatient | TRD     |
| Fitzgerald et al., 2012 (2) <sup>2</sup> | 22 (14) | 20 (8)  | 40.5 (15.5) | 44.9 (15.7)   | MDD   | 24.3 (3.6) <sup>a</sup>  | 22.8 (2.1) <sup>a</sup>   | No  | NR         | TRD     |
| McDonald et al., 2006 <sup>8</sup>       | 50 (27) | 12 (5)  | NR          | NR            | Mixed | 26.4 (1.38) <sup>b</sup> | 27.33 (2.86) <sup>b</sup> | Yes | Outpatient | TRD     |

## BRAIN STIMULATION DEPRESSION META-ANALYSIS

|                                    |          |          |               |               |       |                           |                           |     |            |       |
|------------------------------------|----------|----------|---------------|---------------|-------|---------------------------|---------------------------|-----|------------|-------|
| Pallanti et al., 2010 (2)          | 20 (11)  | 20 (12)  | 47.6 (12.3)   | 47.9 (9.1)    | MDD   | 28.8 (6.0) <sup>a</sup>   | 29.1 (3.5) <sup>a</sup>   | Yes | Outpatient | TRD   |
| Prasser et al., 2015 (1)           | 17 (8)   | 17 (9)   | 50.4 (9.9)    | 42.6 (12.4)   | Mixed | 25.0 (4.4) <sup>b</sup>   | 25.3 (5.4) <sup>b</sup>   | No  | Mixed      | Mixed |
| iTBS                               |          |          |               |               |       |                           |                           |     |            |       |
| Duprat et al., 2016                | 22 (16)  | 25 (17)  | 40.09 (11.45) | 43.16 (12.15) | MDD   | 21.14 (4.99) <sup>a</sup> | 21.52 (6.21) <sup>a</sup> | Yes | Mixed      | TRD   |
| Li et al., 2014 (1)                | 15 (8)   | 15 (11)  | 42.4 (NR)     | 46.9 (NR)     | MDD   | 23.1 (3.9) <sup>a</sup>   | 23.8 (3.2) <sup>a</sup>   | Yes | NR         | TRD   |
| cTBS                               |          |          |               |               |       |                           |                           |     |            |       |
| Li et al., 2014 (2)                | 15 (10)  | 15 (11)  | 49.2 (NR)     | 46.9 (NR)     | MDD   | 24.3 (5.5) <sup>a</sup>   | 23.8 (3.2) <sup>a</sup>   | Yes | NR         | TRD   |
| BLTBS                              |          |          |               |               |       |                           |                           |     |            |       |
| Li et al., 2014 (3)                | 15 (11)  | 15 (11)  | 42.5 (NR)     | 46.9 (NR)     | MDD   | 25.4 (5.1) <sup>a</sup>   | 23.8 (3.2) <sup>a</sup>   | Yes | NR         | TRD   |
| Prasser et al., 2015 (2)           | 20 (10)  | 17 (9)   | 48.2 (10.9)   | 42.6 (12.4)   | Mixed | 27.4 (6.5) <sup>b</sup>   | 25.3 (5.4) <sup>b</sup>   | No  | Mixed      | Mixed |
| dTMS                               |          |          |               |               |       |                           |                           |     |            |       |
| Levkovitz et al. 2015 <sup>6</sup> | 101 (48) | 111 (53) | 45.1 (11.7)   | 47.6 (11.6)   | MDD   | 23.5 (4.3) <sup>b</sup>   | 23.4 (3.7) <sup>b</sup>   | Yes | Outpatient | TRD   |
| Tavares et al., 2017 <sup>6</sup>  | 25 (17)  | 25 (18)  | 43.5 (12)     | 41.2 (8.9)    | BD    | 25.32 (3.76) <sup>a</sup> | 25.8 (5.25) <sup>a</sup>  | NA  | Outpatient | TRD   |



## BRAIN STIMULATION DEPRESSION META-ANALYSIS

| sTMS                               |         |         |             |             |     |                         |                         |     |            |         |
|------------------------------------|---------|---------|-------------|-------------|-----|-------------------------|-------------------------|-----|------------|---------|
| Jin et al., 2014 <sup>6,9,10</sup> | 29 (16) | 16 (9)  | 42.5 (15.0) | 46.3 (12.7) | MDD | 21.3 (4.0) <sup>a</sup> | 19.4 (4.1) <sup>a</sup> | No  | Outpatient | non-TRD |
| Leuchter et al., 2015              | 59 (NR) | 61 (NR) | 46.7 (11.2) | 45.7 (12.6) | MDD | 21.8 (3.8) <sup>a</sup> | 21.2 (2.9) <sup>a</sup> | Yes | Mixed      | Mixed   |

*Note.* Mean ages are reported in years with standard deviation in parentheses for each of the active and sham treatment arms. The mean Hamilton Depression Rating Scale (HDRS) score at baseline is reported for each study with standard deviation in parentheses (except for Concerto et al., 2015 and Hansen et al., 2004 for which median, first quartile, and third quartile are reported). The Montgomery-Åsberg Depression Rating Scale (MADRS) score, denoted with superscript <sup>M</sup>, is reported when the HDRS was not recorded. Means and standard deviations are rounded to the first figure after the decimal. Status refers to whether patients were outpatients, inpatients in a hospital admission, or whether there were both outpatients and inpatients (mixed). TMS = transcranial magnetic stimulation; HF-L = high-frequency left-sided repetitive transcranial magnetic stimulation; LF-R = low-frequency right-sided repetitive transcranial magnetic stimulation; BL = bilateral repetitive transcranial magnetic stimulation; iTBS = intermittent theta burst stimulation; cTBS = continuous theta burst stimulation; BLTBS = bilateral theta burst stimulation; dTMS = deep transcranial magnetic stimulation; sTMS = synchronised transcranial magnetic stimulation; NR = not reported; NA = not applicable; MDD = major depressive disorder; BD = bipolar depression; TRD = treatment resistant depression. <sup>1</sup>MADRS based on the intention-to-treat sample who received  $\geq 1$  session of active stimulation. <sup>2</sup>Numbers are based on the intention-to-treat sample. <sup>3,4,5,8,9</sup>Two active treatment groups were combined. <sup>6</sup>Numbers based on the intention-to-treat sample who received  $\geq 1$  session of active stimulation. <sup>7</sup>HDRS based on the intention-to-treat sample. <sup>10</sup>Age based on the intention-to-treat sample who received  $\geq 1$  session of active stimulation. <sup>11</sup>Age based on 11 patients. <sup>12</sup>Two patients had mixed features. <sup>13</sup>Indicates Median and IQR. <sup>a</sup>HDRS-17. <sup>b</sup>HDRS-21. <sup>c</sup>HDRS-25. <sup>d</sup>HDRS-24. <sup>e</sup>HDRS-28.

## BRAIN STIMULATION DEPRESSION META-ANALYSIS

Table 3

*Treatment characteristics: tDCS studies*

| Authors                           | Location |                   | Electrode size    | Current strength | Current density | Session duration | Number of sessions | Treatment strategy | Sham stimulation |
|-----------------------------------|----------|-------------------|-------------------|------------------|-----------------|------------------|--------------------|--------------------|------------------|
|                                   | Anode    | Cathode/Reference |                   |                  |                 |                  |                    |                    |                  |
| Fregni et al., 2006a              | F3       | FP2               | 35cm <sup>2</sup> | 1mA              | 0.028           | 20min            | 5                  | Monotherapy        | 05sec            |
| Fregni et al., 2006b              | F3       | FP2               | 35cm <sup>2</sup> | 1mA              | 0.028           | 20min            | 5                  | Monotherapy        | 05sec            |
| Boggio et al., 2008 <sup>1</sup>  | F3       | FP2; Midline      | 35cm <sup>2</sup> | 2mA              | 0.057           | 20min            | 10                 | Monotherapy        | 30sec            |
| Loo et al., 2010                  | pF3      | F8                | 35cm <sup>2</sup> | 1mA              | 0.028           | 20min            | 5                  | Mixed              | 30sec            |
| Blumberger et al., 2012           | F3       | F4                | 35cm <sup>2</sup> | 2mA              | 0.057           | 20min            | 15                 | Mixed              | 30sec            |
| Brunoni et al., 2013 <sup>2</sup> | F3       | F4                | 25cm <sup>2</sup> | 2mA              | 0.080           | 30min            | 12                 | Monotherapy        | 60sec            |
| Salehinejad et al., 2015          | F3       | F4                | 35cm <sup>2</sup> | 2mA              | 0.057           | 20min            | 22                 | Monotherapy        | 30sec            |
| Salehinejad et al., 2017          | F3       | F4                | 35cm <sup>2</sup> | 2mA              | 0.057           | 30min            | 10                 | Monotherapy        | 30sec            |
| Brunoni et al., 2017 <sup>2</sup> | F3       | F4                | 25cm <sup>2</sup> | 2mA              | 0.080           | 30min            | 10                 | Monotherapy        | 30sec            |

*Note.* Electrode locations are reported according to the EEG 10/20 system. Current densities are reported in mA/cm<sup>2</sup>. Sham stimulation indicates the duration of time that current was applied for giving an initial sensation of tDCS on the scalp. tDCS = transcranial direct current stimulation. <sup>1</sup>Two sham treatment groups were combined. <sup>2</sup>Patients in sham group also received an oral placebo tablet.

## BRAIN STIMULATION DEPRESSION META-ANALYSIS

Table 4

*Sample characteristics: tDCS studies*

| Authors                                | Number of participants<br>(female) |         | Age         |               | Diagnosis | HDRS                      |                          | Excluded<br>psychosis | Status     | Treatment<br>resistance |
|----------------------------------------|------------------------------------|---------|-------------|---------------|-----------|---------------------------|--------------------------|-----------------------|------------|-------------------------|
|                                        | Active                             | Sham    | Active      | Sham          |           | Active                    | Sham                     |                       |            |                         |
| Fregni et al., 2006a                   | 5 (NR)                             | 5 (NR)  | NR          | NR            | MDD       | NR                        | NR                       | NR                    | NR         | NR                      |
| Fregni et al., 2006b                   | 9 (5)                              | 9 (6)   | 47.6 (10.4) | 45.3 (9.3)    | MDD       | 23,6 (5,0)                | 25,9 (4,3)               | Yes <sup>a</sup>      | Outpatient | NR                      |
| Boggio et al., 2008 <sup>1</sup>       | 21 (14)                            | 19 (13) | 51.6 (7.7)  | 46.4 (7.1)    | MDD       | 21,1 (4,4) <sup>b</sup>   | 21,8 (4,8) <sup>b</sup>  | Yes                   | NR         | Mixed                   |
| Loo et al., 2010 <sup>2</sup>          | 20 (11)                            | 20 (11) | 49.0 (10.0) | 45.6 (12.5)   | MDD       | 18,3 (5,8) <sup>c</sup>   | 17,3 (4,7) <sup>c</sup>  | Yes <sup>a</sup>      | Outpatient | Mixed                   |
| Blumberger et al., 2012 <sup>3,6</sup> | 13 (10)                            | 11 (10) | 45.3 (11.6) | 49.7 (9.4)    | MDD       | 24,9 (3,1) <sup>c</sup>   | 24,1 (2,9) <sup>c</sup>  | Yes                   | Outpatient | TRD                     |
| Brunoni et al., 2013 <sup>4</sup>      | 30 (21)                            | 30 (20) | 41.0 (12.0) | 46.4 (14.0)   | MDD       | 21,0 (3,8) <sup>c</sup>   | 22,0 (4,2) <sup>c</sup>  | Yes                   | Outpatient | Mixed                   |
| Salehinejad et al., 2015               | 15 (8)                             | 15 (9)  | 28.7 (5.87) | 27.9 (5.84)   | MDD       | 24.7 (3.05) <sup>d</sup>  | 22.8 (2.06) <sup>d</sup> | Yes                   | Outpatient | TRD                     |
| Salehinejad et al., 2017               | 12 (7)                             | 12 (8)  | 26.8 (7.1)  | 25.5 (4.6)    | MDD       | 24,6 (2,6) <sup>d</sup>   | 22,6 (1,9) <sup>d</sup>  | Yes                   | Outpatient | non-TRD                 |
| Brunoni et al., 2017 <sup>5,6,7</sup>  | 91 (64)                            | 60 (41) | 44 (11.19)  | 40.88 (12.87) | MDD       | 21.93 (3.89) <sup>c</sup> | 22.7 (4.27) <sup>c</sup> | Yes                   | Outpatient | Mixed                   |

## BRAIN STIMULATION DEPRESSION META-ANALYSIS

---

*Note.* Mean ages are reported in years with standard deviation in parentheses for each of the active and sham treatment arms. The mean Hamilton Depression Rating Scale (HDRS) score at baseline is reported for each study with standard deviation in parentheses. Means and standard deviations are rounded to the first figure after the decimal. Status refers to whether patients were outpatients, inpatients in a hospital admission, or whether there were both outpatients and inpatients (mixed). tDCS = transcranial direct current stimulation; MDD = major depressive disorder; TRD = treatment resistant depression; NR = not reported. <sup>1</sup>Two sham treatment groups were combined. <sup>2,3,4,7</sup>Numbers are based on the intention-to-treat sample. <sup>5</sup>Numbers based on participants of age  $\leq 70$  years. <sup>6</sup>Patients in sham group also received an oral placebo tablet. <sup>a</sup>Excluded “other psychiatric disorders.” <sup>b</sup>HDRS-21. <sup>c</sup>HDRS-17. <sup>d</sup>HDRS-24.

## BRAIN STIMULATION DEPRESSION META-ANALYSIS

Table 5

*Random-Effects Meta-Analysis of Response Rates*

| Treatment Modality | <i>k</i> | Odds Ratio  | 95% Confidence Interval |              | Q     | I <sup>2</sup> |
|--------------------|----------|-------------|-------------------------|--------------|-------|----------------|
| HF-L               | 31       | <b>3.94</b> | <b>2.52</b>             | <b>6.15</b>  | 41.15 | 27.1%          |
| LF-R               | 3        | <b>7.44</b> | <b>2.06</b>             | <b>26.83</b> | 1.59  | 0.0%           |
| LF-L               | 3        | 1.41        | 0.15                    | 12.88        | 0.14  | 0.0%           |
| BL                 | 6        | <b>3.68</b> | <b>1.66</b>             | <b>8.13</b>  | 3.45  | 0.0%           |
| cTBS*              | 1        | 1.63        | 0.23                    | 11.46        | -     | -              |
| iTBS               | 2        | <b>4.70</b> | <b>1.14</b>             | <b>19.38</b> | 0.02  | 0.0%           |
| blTBS              | 2        | 4.28        | 0.54                    | 34.27        | 2.91  | 65.7%          |
| dTMS               | 2        | <b>1.69</b> | <b>1.003</b>            | <b>2.85</b>  | 0.97  | 0.0%           |
| sTMS               | 2        | 2.71        | 0.44                    | 16.86        | 4.15  | 75.9%          |
| tDCS               | 8        | <b>4.32</b> | <b>2.02</b>             | <b>9.29</b>  | 10.64 | 34.2%          |

*Note.* HF-L = high-frequency, left-sided repetitive transcranial magnetic stimulation; LF-R = low-frequency, right-sided repetitive transcranial magnetic stimulation; LF-L = low-frequency, left-sided repetitive transcranial magnetic stimulation; BL = bilateral repetitive transcranial magnetic stimulation; dTMS = deep transcranial magnetic stimulation; cTBS = continuous theta burst stimulation; iTBS = intermittent theta burst stimulation; blTBS = bilateral theta burst stimulation; sTMS = synchronised transcranial magnetic stimulation; tDCS = transcranial magnetic stimulation. \*; inverse variance method used.

## BRAIN STIMULATION DEPRESSION META-ANALYSIS

Table 6

### *Random-Effects Meta-Analysis of Remission Rates*

| Treatment Modality | <i>k</i> | Odds Ratio   | 95% Confidence Interval |              | Q     | I <sup>2</sup> |
|--------------------|----------|--------------|-------------------------|--------------|-------|----------------|
| HF-L               | 25       | <b>2.74</b>  | <b>1.75</b>             | <b>4.28</b>  | 22.67 | 0.0%           |
| LF-R               | 2        | <b>14.10</b> | <b>2.79</b>             | <b>71.42</b> | 0.50  | 0.0%           |
| LF-L               | 3        | 0.86         | 0.08                    | 9.11         | 0.03  | 0.0%           |
| BL                 | 5        | <b>3.05</b>  | <b>0.87</b>             | <b>10.67</b> | 4.48  | 10.7%          |
| cTBS               | -        | -            | -                       | -            | -     | -              |
| iTBS*              | 1        | 6.22         | 0.28                    | 136.90       | -     | -              |
| blTBS*             | 1        | 1.32         | 0.19                    | 9.02         | -     | -              |
| dTMS               | 2        | <b>2.24</b>  | <b>1.24</b>             | <b>4.06</b>  | 0.02  | 0.0%           |
| sTMS               | 2        | 2.51         | 0.23                    | 26.76        | 4.12  | 75.7%          |
| tDCS               | 7        | <b>3.07</b>  | <b>1.58</b>             | <b>5.99</b>  | 6.27  | 4.4%           |

*Note.* HF-L = high-frequency, left-sided repetitive transcranial magnetic stimulation; LF-R = low-frequency, right-sided repetitive transcranial magnetic stimulation; LF-L = low-frequency, left-sided repetitive transcranial magnetic stimulation; BL = bilateral repetitive transcranial magnetic stimulation; dTMS = deep transcranial magnetic stimulation; cTBS = continuous theta burst stimulation; iTBS = intermittent theta burst stimulation; blTBS = bilateral theta burst stimulation; sTMS = synchronised transcranial magnetic stimulation; tDCS = transcranial magnetic stimulation. \*; inverse variance method used.

## BRAIN STIMULATION DEPRESSION META-ANALYSIS

Table 7

### *Random-Effects Meta-Analysis of Continuous Treatment Effects*

| Treatment Modality | <i>k</i> | <i>g</i>     | 95% Confidence Interval |              | Q      | I <sup>2</sup> |
|--------------------|----------|--------------|-------------------------|--------------|--------|----------------|
| HF-L               | 28       | <b>-0.75</b> | <b>-1.02</b>            | <b>-0.47</b> | 101.64 | 73.4%          |
| LF-R               | 2        | -0.77        | -1.64                   | 0.09         | 2.72   | 63.3%          |
| LF-L               | 2        | -0.33        | -1.18                   | 0.51         | 0.76   | 0.0%           |
| BL                 | 4        | -0.07        | -0.38                   | 0.25         | 0.25   | 0.0%           |
| cTBS               | -        | -            | -                       | -            | -      | -              |
| iTBS               | 1        | -0.44        | -1.02                   | 0.14         | 0.00   | -              |
| blTBS              | 1        | -0.03        | -0.65                   | 0.56         | -      | -              |
| dTMS               | 2        | -0.29        | -0.55                   | -0.03        | 0.75   | 0.0%           |
| sTMS               | 2        | -0.55        | -1.13                   | 0.02         | 3.24   | 69.1%          |
| tDCS               | 6        | -0.76        | -1.42                   | -0.10        | 32.65  | 84.7%          |

*Note.* HF-L = high-frequency, left-sided repetitive transcranial magnetic stimulation; LF-R = low-frequency, right-sided repetitive transcranial magnetic stimulation; LF-L = low-frequency, left-sided repetitive transcranial magnetic stimulation; BL = bilateral repetitive transcranial magnetic stimulation; dTMS = deep transcranial magnetic stimulation; cTBS = continuous theta burst stimulation; iTBS = intermittent theta burst stimulation; blTBS = bilateral theta burst stimulation; sTMS = synchronised transcranial magnetic stimulation; tDCS = transcranial magnetic stimulation. \*, inverse variance method used.

## BRAIN STIMULATION DEPRESSION META-ANALYSIS

Table 8

*Random-Effects Meta-Analysis of All-cause Discontinuation Rates*

| Treatment Modality | <i>k</i> | Odds Ratio | 95% Confidence Interval |       | Q     | I <sup>2</sup> |
|--------------------|----------|------------|-------------------------|-------|-------|----------------|
| HF-L               | 34       | 0.85       | 0.59                    | 1.23  | 14.54 | 0.0%           |
| LF-R               | 3        | 0.48       | 0.12                    | 1.99  | 0.35  | 0.0%           |
| LF-L               | 3        | 0.84       | 0.11                    | 6.73  | 0.71  | 0.0%           |
| BL                 | 6        | 0.90       | 0.33                    | 2.43  | 3.03  | 0.0%           |
| cTBS*              | 1        | 1.00       | 0.02                    | 53.66 | -     | -              |
| iTBS               | 2        | 1.06       | 0.06                    | 17.66 | 0.00  | 0.0%           |
| BLTBS              | 2        | 0.47       | 0.04                    | 5.88  | 0.23  | 0.0%           |
| dTMS               | 2        | 1.03       | 0.32                    | 3.36  | 2.10  | 52.3%          |
| sTMS               | 2        | 0.72       | 0.36                    | 1.44  | 0.32  | 0.0%           |
| tDCS               | 9        | 1.34       | 0.68                    | 2.66  | 6.66  | 0.0%           |

*Note.* HF-L = high-frequency, left-sided repetitive transcranial magnetic stimulation; LF-R = low-frequency, right-sided repetitive transcranial magnetic stimulation; LF-L = low-frequency, left-sided repetitive transcranial magnetic stimulation; BL = bilateral repetitive transcranial magnetic stimulation; dTMS = deep transcranial magnetic stimulation; cTBS = continuous theta burst stimulation; iTBS = intermittent theta burst stimulation; bITBS = bilateral theta burst stimulation; sTMS = synchronised transcranial magnetic stimulation; tDCS = transcranial magnetic stimulation. \*; inverse variance method used.



Figure 1. Preferred Reporting Items for Systematic Reviews and Meta-Analyses (PRISMA) flow diagram of literature search.

bioRxiv preprint doi: <https://doi.org/10.1101/287656>; this version posted March 26, 2018. The copyright holder for this preprint (which was not certified by peer review) is the author/funder, who has granted bioRxiv a license to display the preprint in perpetuity. It is made available under aCC-BY-NC-ND 4.0 International license.

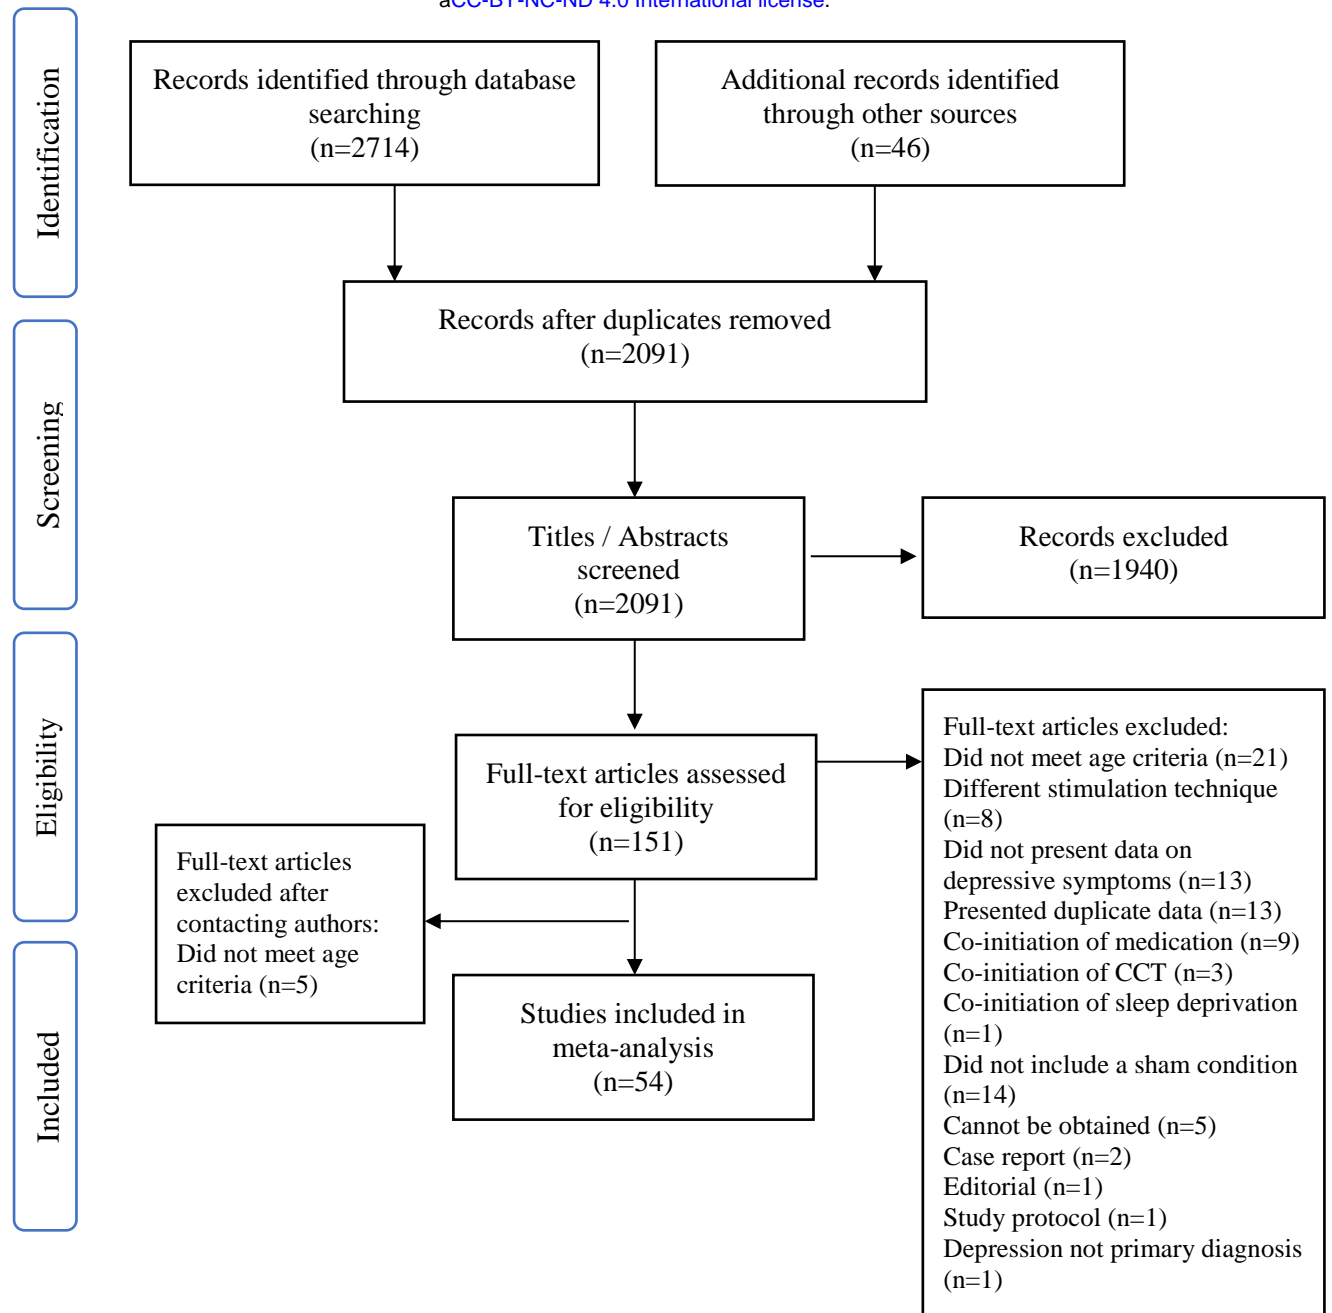

Figure 2. Contour-enhanced funnel plot of all RCTs included in the meta-analysis of response rates.

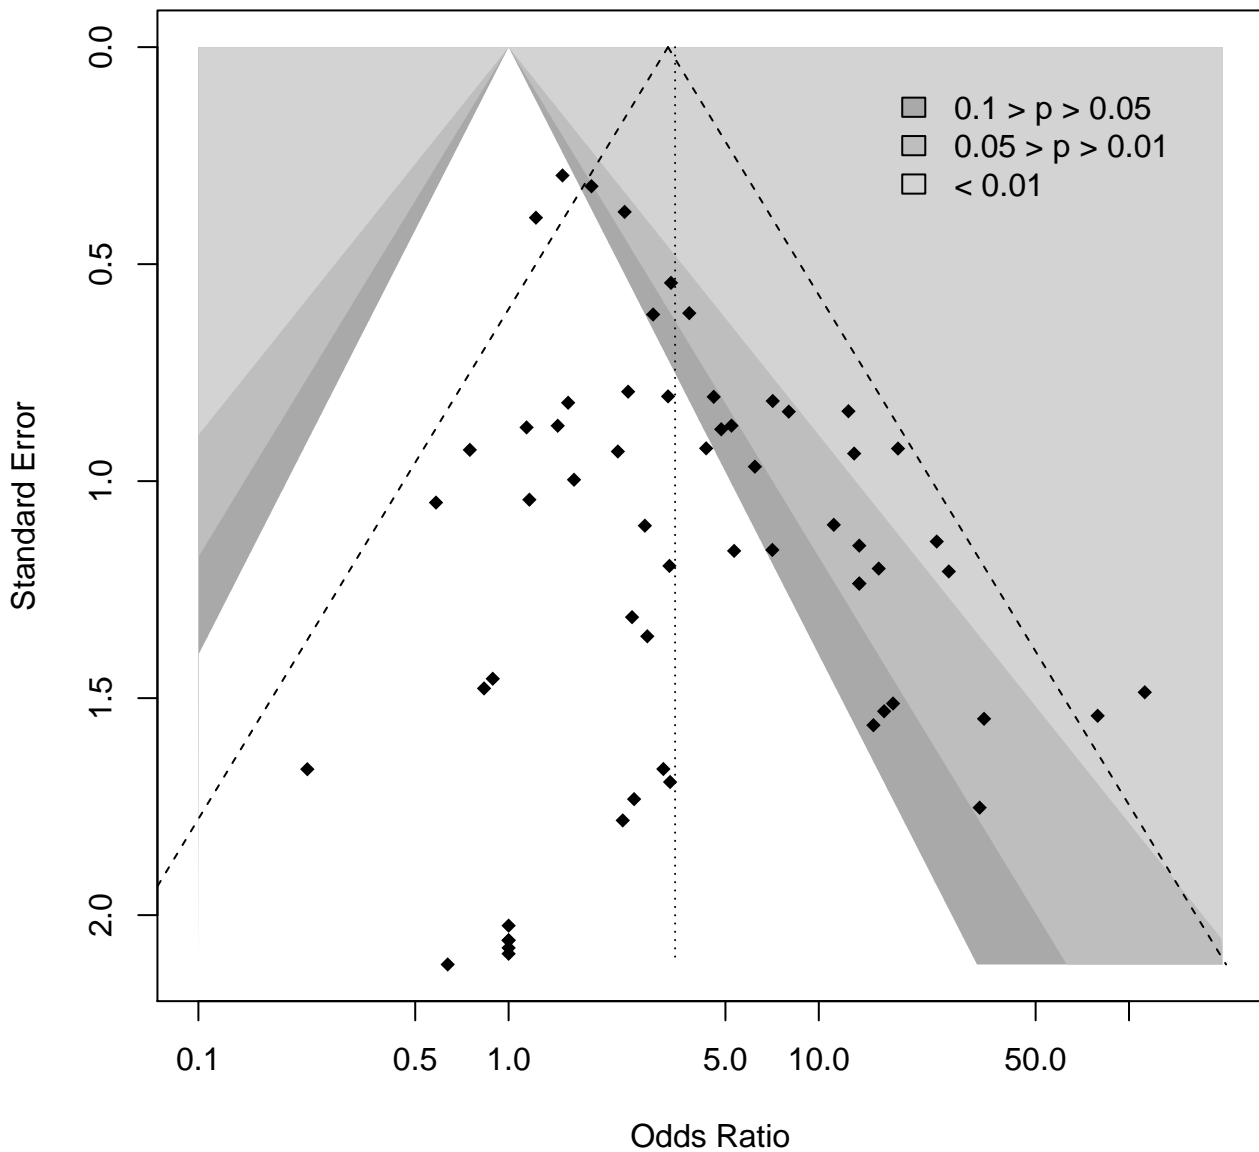

Figure 3. Forest plot of response rates.

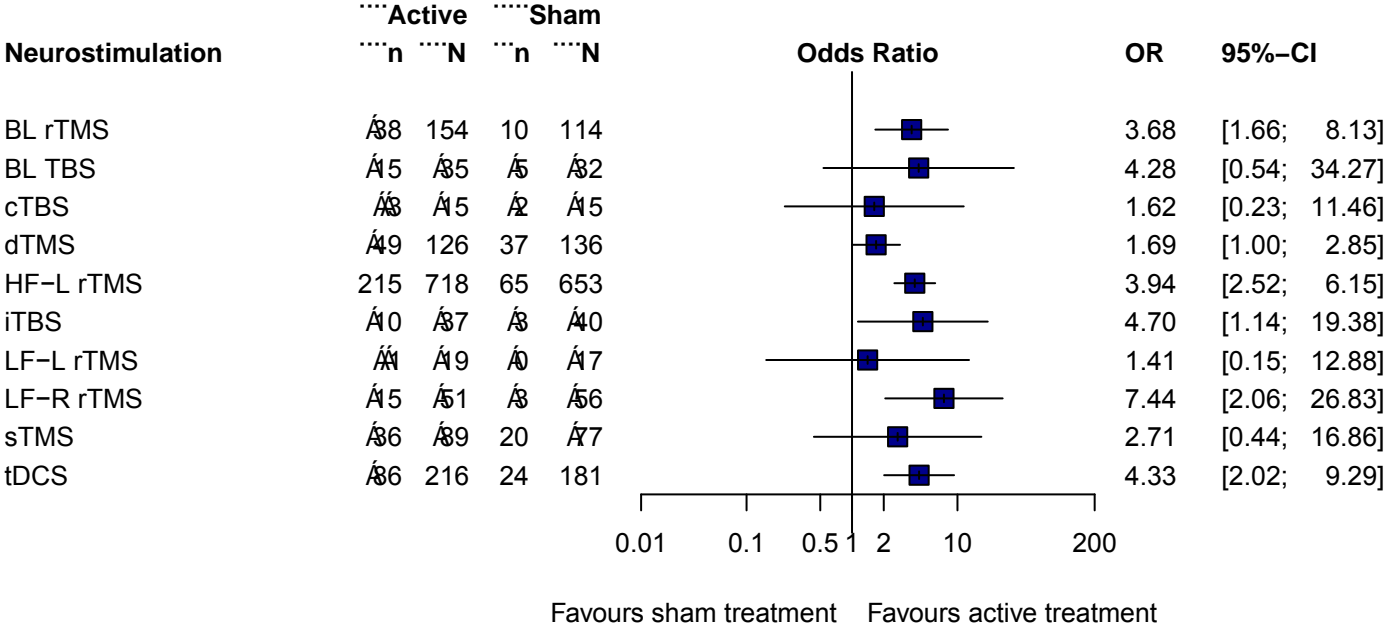

Figure 4. Forest plot of remission rates.

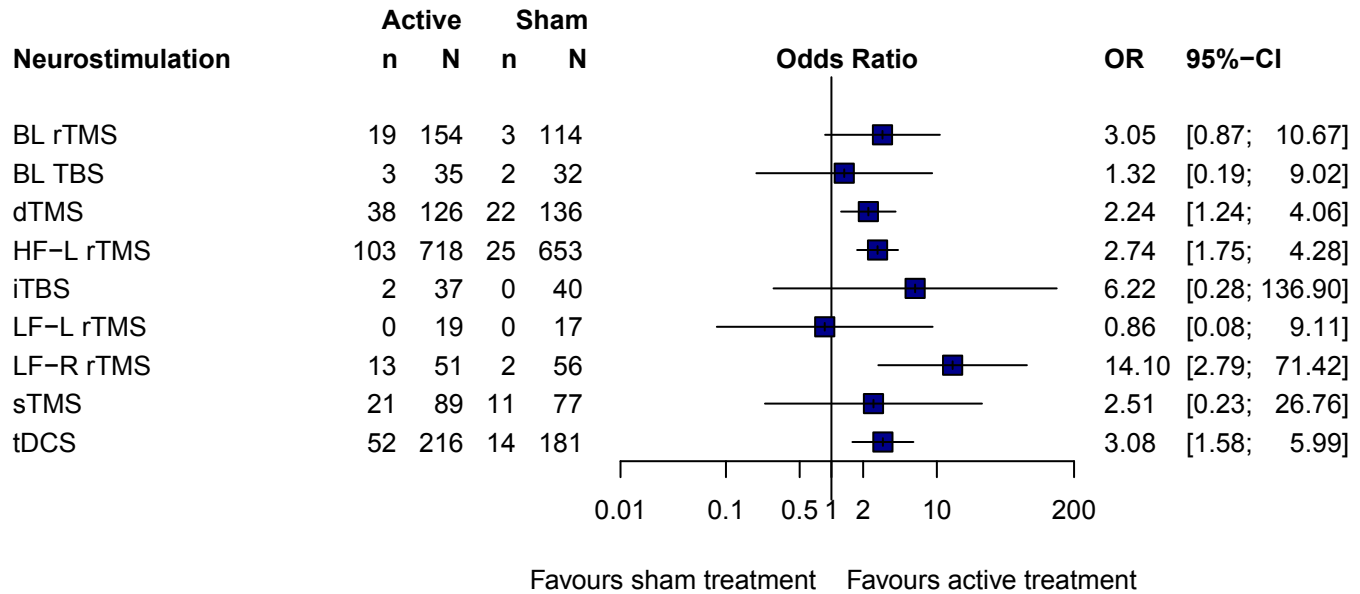

Figure 5. Forest plot of post-treatment continuous depression scores.

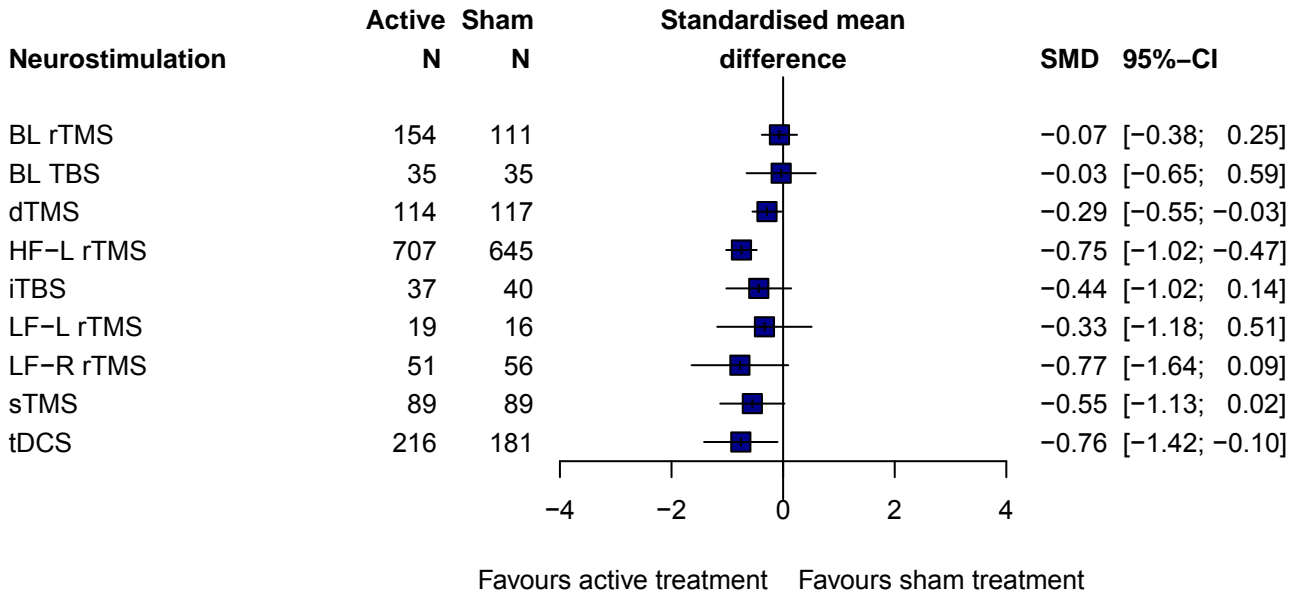

Figure 6. Forest plot of all-cause discontinuation rates.

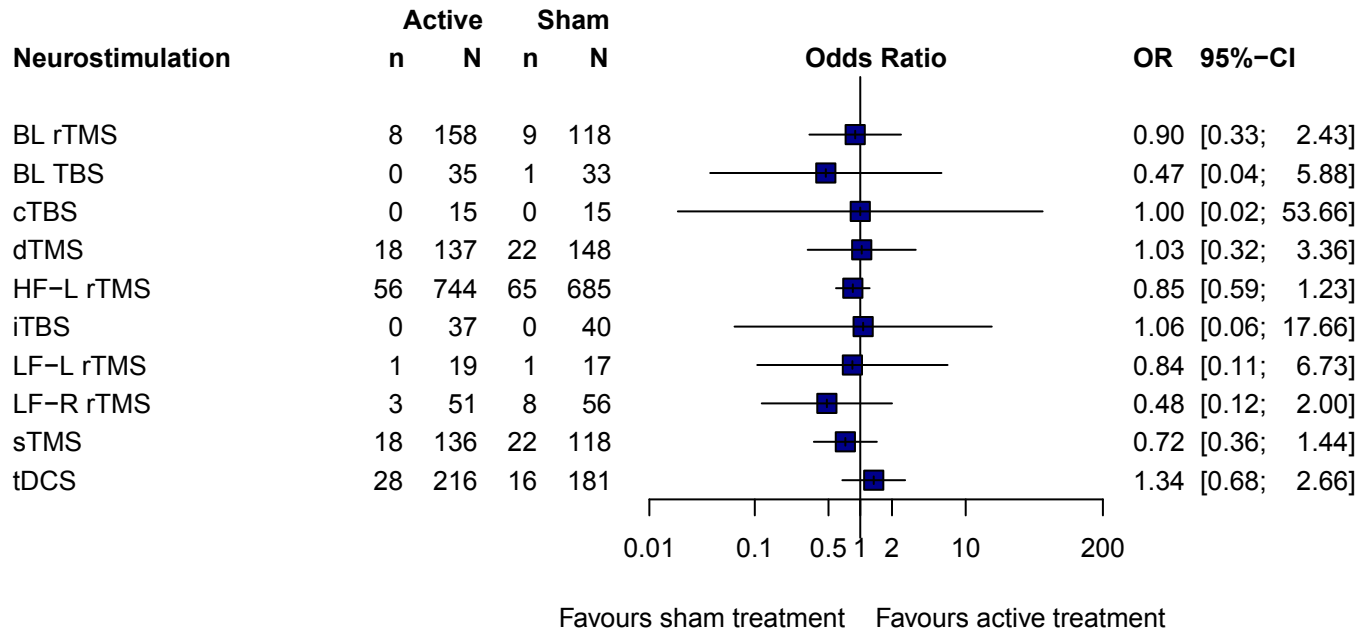

Source: https://www.biorxiv.org/content/biorxiv/early/2018/03/26/287656.full.pdf
